# Supplementary material
Source: PubMed Central journal article supplement (PMC4186924)
Supplement: NIHMS615455-supplement-supplement_1.pdf [file NIHMS615455-supplement-supplement_1.pdf]

## Supplemental Figure 1

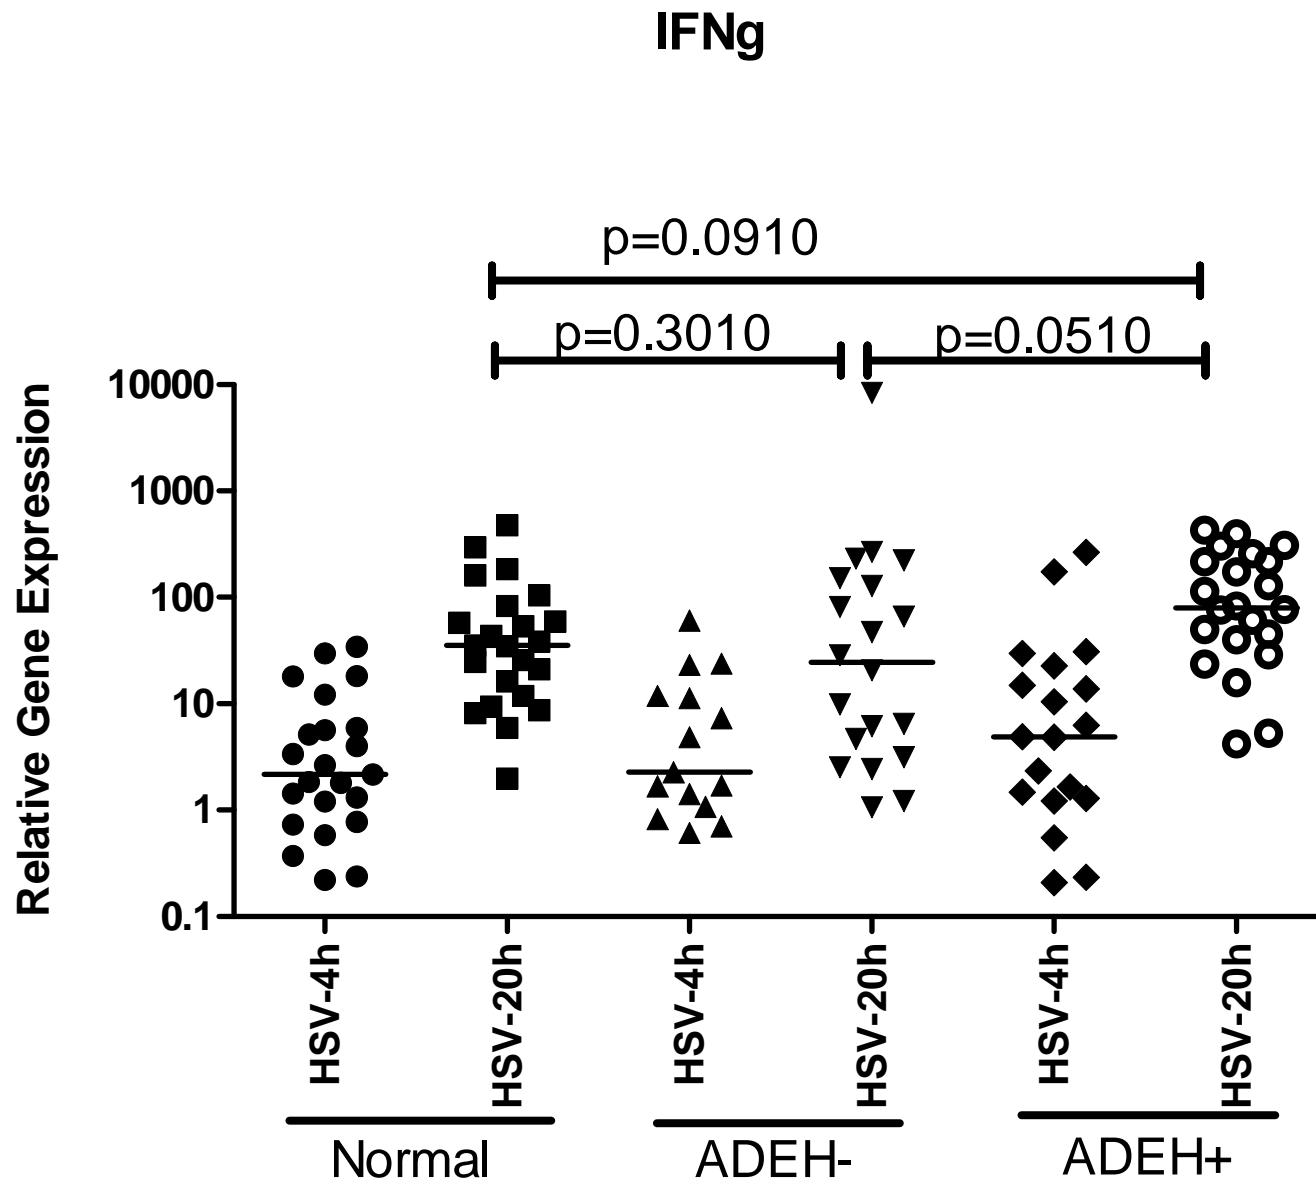

## Supplemental Figure 2

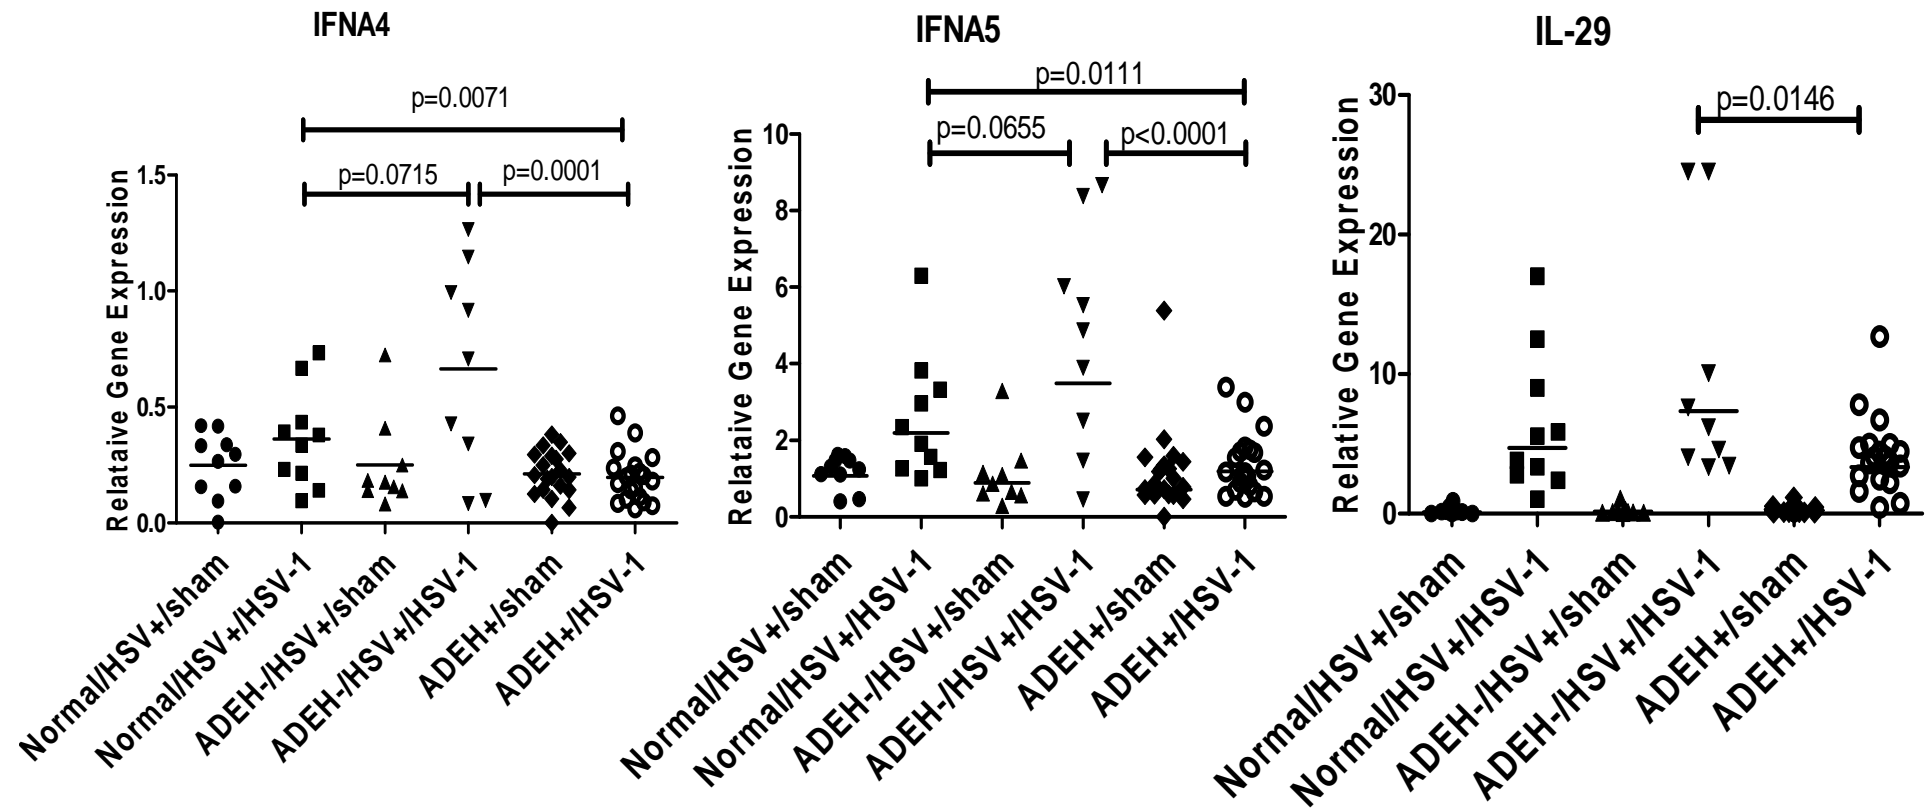

## Supplemental Figure 3

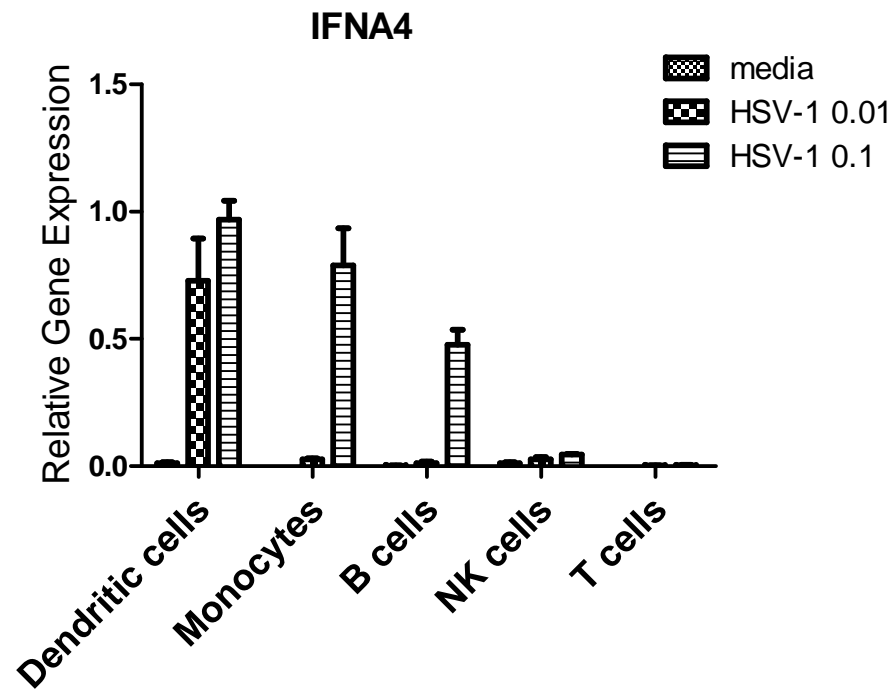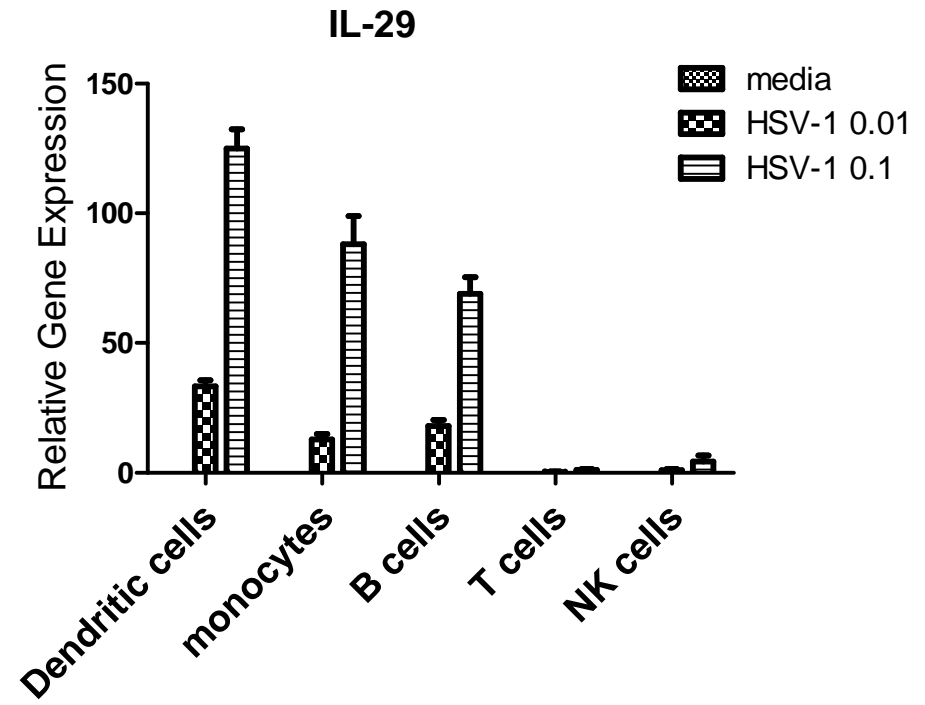

**Supplemental Table I: Demographic characteristics of human subjects**

|                                        | Diagnostic Group  |                   |                   |
|----------------------------------------|-------------------|-------------------|-------------------|
|                                        | Normal<br>(N= 20) | ADEH-<br>(N= 20)  | ADEH+<br>(N= 20)  |
| Age (years) Mean (SD)                  | 29.7 (13.1)       | 30.0 (14.6)       | 28.2(13.7)        |
| Female N(%)                            | 11(55%)           | 11 (55%)          | 11 (55%)          |
| African American N(%)                  | 1(5%)             | 5(25%)            | 5 (25%)           |
| Caucasian N(%)                         | 17(85%)           | 11 (55%)          | 14(70%)           |
| Other N(%)                             | 2(10%)            | 4(20%)            | 1(5%)             |
| Rajka-Langeland Mean (SD)              | -                 | 6.6(1.5)          | 6.9 (1.6)         |
| EASI Median (Q1, Q3)                   | -                 | 5.60 (1.80,17.18) | 12.85(5.55,24.88) |
| Serum anti-HSV-1 IgG titers (mean±SEM) | 2.26±0.48         | 1.79±0.50         | 4.92±0.14         |
| Serum anti-HSV-1 IgM titers (mean±SEM) | negative          | negative          | negative          |

Supplemental Table 2. RNA-seq Read Summary

| Subject # | treatment | Atopic dermatitis type | Total number of reads | Reads that overlap exon (%) | Reads which partially overlap exon (%) | Reads within an intron (%) | Reads between genes (%) | Number of transcripts in the model | Transcript with reads (%) | Total reads with junctions | Reads with junctions compatible with a transcript |
|-----------|-----------|------------------------|-----------------------|-----------------------------|----------------------------------------|----------------------------|-------------------------|------------------------------------|---------------------------|----------------------------|---------------------------------------------------|
| 1         | Sham      | ADEH+                  | 3.4E+07               | 73.2                        | 2.5                                    | 10.9                       | 9.6                     | 38868                              | 73.3                      | 1.3E+07                    | 1.2E+07                                           |
| 2         | Sham      | ADEH+                  | 5.1E+07               | 79.3                        | 1.9                                    | 7.9                        | 7.6                     | 38868                              | 74.5                      | 2.0E+07                    | 1.8E+07                                           |
| 3         | Sham      | ADEH+                  | 3.8E+07               | 74.8                        | 2.3                                    | 9.9                        | 9.2                     | 38868                              | 74.7                      | 1.5E+07                    | 1.4E+07                                           |
| 4         | Sham      | ADEH+                  | 4.2E+07               | 77.1                        | 2.1                                    | 9.1                        | 8.2                     | 38868                              | 73.9                      | 1.7E+07                    | 1.6E+07                                           |
| 5         | Sham      | ADEH+                  | 5.9E+07               | 78.9                        | 2.0                                    | 7.5                        | 8.1                     | 38868                              | 75.2                      | 2.3E+07                    | 2.1E+07                                           |
| 6         | Sham      | ADEH-                  | 4.8E+07               | 77.3                        | 2.0                                    | 8.5                        | 8.9                     | 38868                              | 74.7                      | 2.0E+07                    | 1.8E+07                                           |
| 7         | Sham      | ADEH-                  | 2.5E+07               | 72.2                        | 2.4                                    | 11.3                       | 10.6                    | 38868                              | 72.9                      | 9.4E+06                    | 8.5E+06                                           |
| 8         | Sham      | ADEH-                  | 6.6E+07               | 76.1                        | 2.1                                    | 9.7                        | 9.1                     | 38868                              | 75.9                      | 2.5E+07                    | 2.3E+07                                           |
| 9         | Sham      | ADEH-                  | 3.8E+07               | 73.5                        | 2.4                                    | 11.5                       | 8.9                     | 38868                              | 73.8                      | 1.5E+07                    | 1.3E+07                                           |
| 10        | Sham      | ADEH-                  | 4.2E+07               | 79.3                        | 1.9                                    | 7.8                        | 7.5                     | 38868                              | 74.0                      | 1.7E+07                    | 1.6E+07                                           |
| 11        | Sham      | ADEH-                  | 4.3E+07               | 76.2                        | 2.3                                    | 9.6                        | 8.5                     | 38868                              | 74.0                      | 1.7E+07                    | 1.6E+07                                           |
| 1         | HSV-1     | ADEH+                  | 4.7E+07               | 81.1                        | 1.8                                    | 7.4                        | 6.0                     | 38868                              | 72.6                      | 1.9E+07                    | 1.8E+07                                           |
| 2         | HSV-1     | ADEH+                  | 6.2E+07               | 82.3                        | 1.6                                    | 7.0                        | 5.9                     | 38868                              | 74.1                      | 2.5E+07                    | 2.3E+07                                           |
| 3         | HSV-1     | ADEH+                  | 4.1E+07               | 84.1                        | 1.7                                    | 6.3                        | 4.4                     | 38868                              | 72.2                      | 1.6E+07                    | 1.5E+07                                           |
| 4         | HSV-1     | ADEH+                  | 4.1E+07               | 84.0                        | 1.5                                    | 6.0                        | 5.0                     | 38868                              | 71.7                      | 1.7E+07                    | 1.6E+07                                           |
| 5         | HSV-1     | ADEH+                  | 6.8E+07               | 83.2                        | 1.5                                    | 6.4                        | 5.5                     | 38868                              | 73.9                      | 2.8E+07                    | 2.6E+07                                           |
| 6         | HSV-1     | ADEH-                  | 6.0E+07               | 80.7                        | 1.7                                    | 7.6                        | 6.9                     | 38868                              | 74.7                      | 2.4E+07                    | 2.2E+07                                           |
| 7         | HSV-1     | ADEH-                  | 3.8E+07               | 76.0                        | 1.9                                    | 10.1                       | 8.3                     | 38868                              | 72.8                      | 1.4E+07                    | 1.3E+07                                           |
| 8         | HSV-1     | ADEH-                  | 6.4E+07               | 82.4                        | 1.5                                    | 6.9                        | 6.1                     | 38868                              | 74.4                      | 2.6E+07                    | 2.4E+07                                           |
| 9         | HSV-1     | ADEH-                  | 4.3E+07               | 79.2                        | 1.8                                    | 8.4                        | 7.1                     | 38868                              | 73.2                      | 1.7E+07                    | 1.6E+07                                           |
| 10        | HSV-1     | ADEH-                  | 4.5E+07               | 82.9                        | 1.5                                    | 6.5                        | 5.7                     | 38868                              | 72.9                      | 1.9E+07                    | 1.7E+07                                           |
| 11        | HSV-1     | ADEH-                  | 4.1E+07               | 81.4                        | 1.8                                    | 7.3                        | 6.2                     | 38868                              | 72.5                      | 1.7E+07                    | 1.5E+07                                           |
|           |           | <b>Average:</b>        | 4.7E+07               | 78.9                        | 1.9                                    | 8.3                        | 7.4                     | 38868                              | 73.7                      | 1.9E+07                    | 1.7E+07                                           |
|           |           | <b>STDev:</b>          | 1.1E+07               | 3.7                         | 0.3                                    | 1.7                        | 1.7                     | 0                                  | 1.0                       | 4.6E+07                    | 4.3E+06                                           |

**Supplemental Table III: 792 genes are differentially expressed in HSV-1 stimulated PBMCs from ADEH+ as compared to ADEH- subjects.**

|            | Mean<br>rpkm<br>(HSV1-<br>ADEH+) | Mean<br>rpkm<br>(HSV1-<br>ADEH-) | Mean<br>rpkm<br>(sham-<br>ADEH+) | Mean<br>rpkm<br>(sham-<br>ADEH-) | FoldChange<br>(HSV1-<br>ADEH+ vs.<br>HSV1-<br>ADEH-) | p-value<br>(HSV1-<br>ADEH+<br>vs. HSV1-<br>ADEH-) | FDR<br>(HSV1-<br>ADEH+<br>vs. HSV1-<br>ADEH-) |
|------------|----------------------------------|----------------------------------|----------------------------------|----------------------------------|------------------------------------------------------|---------------------------------------------------|-----------------------------------------------|
| SLFN12L    | 6.3435                           | 10.8011                          | 3.05204                          | 4.68972                          | -1.7027                                              | 4.30E-10                                          | 3.75E-06                                      |
| SAMD9      | 170.074                          | 210.189                          | 19.8498                          | 21.8669                          | -1.23587                                             | 9.48E-08                                          | 0.00035                                       |
| IPCEF1     | 18.2221                          | 28.7226                          | 10.4609                          | 13.465                           | -1.57625                                             | 1.52E-07                                          | 0.00035                                       |
| SCML4      | 9.91514                          | 16.2148                          | 7.09387                          | 8.07865                          | -1.63536                                             | 1.60E-07                                          | 0.00035                                       |
| ZDHC13     | 9.24728                          | 7.42793                          | 6.04251                          | 5.98083                          | 1.24493                                              | 3.24E-07                                          | 0.000565                                      |
| TRIM22     | 456.527                          | 593.987                          | 78.7892                          | 91.8588                          | -1.3011                                              | 4.48E-07                                          | 0.000651                                      |
| SLFN13     | 4.80427                          | 9.07833                          | 3.40649                          | 4.15917                          | -1.88964                                             | 7.04E-07                                          | 0.000877                                      |
| VAMP5      | 250.328                          | 135.919                          | 33.145                           | 35.0209                          | 1.84174                                              | 1.81E-06                                          | 0.001497                                      |
| FAM26F     | 707.011                          | 308.529                          | 14.4712                          | 31.5423                          | 2.29156                                              | 2.06E-06                                          | 0.001497                                      |
| TUBB2C     | 94.433                           | 60.7899                          | 42.4769                          | 35.3106                          | 1.55343                                              | 1.62E-06                                          | 0.001497                                      |
| KIAA0664L3 | 5.45805                          | 12.9217                          | 4.50221                          | 7.37107                          | -2.36745                                             | 1.50E-06                                          | 0.001497                                      |
| SERTAD3    | 20.1176                          | 13.1077                          | 16.374                           | 14.1825                          | 1.53479                                              | 2.06E-06                                          | 0.001497                                      |
| KPNB1      | 127.261                          | 151.962                          | 55.2999                          | 57.6487                          | -1.19409                                             | 2.72E-06                                          | 0.001826                                      |
| LILRA6     | 62.3432                          | 24.1426                          | 10.4827                          | 4.70758                          | 2.58229                                              | 2.98E-06                                          | 0.001856                                      |
| TMEM123    | 257.576                          | 372.823                          | 216.495                          | 207.838                          | -1.44743                                             | 4.27E-06                                          | 0.00248                                       |
| TLR1       | 48.4879                          | 24.658                           | 14.2662                          | 13.4788                          | 1.96642                                              | 5.32E-06                                          | 0.002899                                      |
| CLUAP1     | 9.99896                          | 17.4641                          | 7.43203                          | 8.76826                          | -1.74659                                             | 5.67E-06                                          | 0.002905                                      |
| SH2B2      | 7.43964                          | 4.26616                          | 2.41764                          | 2.23115                          | 1.74387                                              | 6.59E-06                                          | 0.00319                                       |
| DDX60      | 96.7067                          | 120.584                          | 7.73048                          | 9.66842                          | -1.2469                                              | 8.05E-06                                          | 0.003562                                      |
| AMBRA1     | 13.2486                          | 16.2268                          | 7.49959                          | 7.77564                          | -1.22479                                             | 9.28E-06                                          | 0.003562                                      |
| PSMD12     | 22.2313                          | 18.0207                          | 13.3456                          | 12.0934                          | 1.23365                                              | 8.80E-06                                          | 0.003562                                      |
| BATF3      | 32.665                           | 17.4472                          | 1.24029                          | 1.88458                          | 1.87222                                              | 9.98E-06                                          | 0.003562                                      |
| KIAA1539   | 16.08                            | 9.17302                          | 9.39153                          | 7.38056                          | 1.75296                                              | 9.20E-06                                          | 0.003562                                      |
| STX3       | 8.92296                          | 5.3295                           | 5.3555                           | 4.92603                          | 1.67426                                              | 1.02E-05                                          | 0.003562                                      |
| ANXA2P2    | 16.6083                          | 5.393                            | 7.76235                          | 3.86594                          | 3.0796                                               | 1.01E-05                                          | 0.003562                                      |
| SEPX1      | 33.9322                          | 15.6747                          | 18.1699                          | 16.1066                          | 2.16478                                              | 1.16E-05                                          | 0.003885                                      |
| C14orf159  | 24.955                           | 33.7106                          | 14.1273                          | 15.6742                          | -1.35086                                             | 1.39E-05                                          | 0.004171                                      |
| SERTAD1    | 42.7862                          | 25.279                           | 14.3106                          | 11.647                           | 1.69256                                              | 1.38E-05                                          | 0.004171                                      |
| DSE        | 100.392                          | 37.4688                          | 16.9028                          | 11.8611                          | 2.67934                                              | 1.36E-05                                          | 0.004171                                      |
| KPNA2      | 25.6862                          | 18.8664                          | 12.7617                          | 11.3766                          | 1.36148                                              | 1.48E-05                                          | 0.004302                                      |
| ANKRD22    | 103.226                          | 52.0377                          | 0.684342                         | 3.34835                          | 1.98367                                              | 1.87E-05                                          | 0.005266                                      |
| STX12      | 25.9591                          | 16.4746                          | 12.5073                          | 10.7275                          | 1.57571                                              | 2.17E-05                                          | 0.005737                                      |
| ZNF800     | 11.8162                          | 14.9526                          | 10.8425                          | 12.3181                          | -1.26543                                             | 2.11E-05                                          | 0.005737                                      |

|          |         |         |          |          |          |          |          |
|----------|---------|---------|----------|----------|----------|----------|----------|
| IFI44L   | 168.505 | 209.758 | 3.94219  | 3.21667  | -1.24482 | 2.83E-05 | 0.007064 |
| CSF2RB   | 274.907 | 122.359 | 60.5075  | 52.8512  | 2.24673  | 2.84E-05 | 0.007064 |
| FMR1     | 21.0765 | 25.4575 | 13.2233  | 14.426   | -1.20787 | 2.96E-05 | 0.007158 |
| PCGF5    | 30.1069 | 37.1759 | 13.8565  | 14.8036  | -1.2348  | 3.14E-05 | 0.007266 |
| PDCD4    | 51.5276 | 83.2566 | 71.0773  | 74.7136  | -1.61577 | 3.17E-05 | 0.007266 |
| XAF1     | 272.457 | 327.472 | 22.3381  | 21.4722  | -1.20192 | 3.43E-05 | 0.007474 |
| PRKD2    | 47.0025 | 67.0081 | 23.0261  | 24.7386  | -1.42563 | 3.37E-05 | 0.007474 |
| DSCR3    | 28.745  | 23.5588 | 20.4608  | 19.5197  | 1.22014  | 3.61E-05 | 0.007495 |
| TBC1D15  | 9.46835 | 13.8231 | 14.9879  | 14.7823  | -1.45993 | 3.53E-05 | 0.007495 |
| TRIM14   | 55.29   | 69.2965 | 19.4696  | 22.4376  | -1.25333 | 3.96E-05 | 0.007567 |
| PARP11   | 15.2066 | 19.5294 | 4.2548   | 5.02014  | -1.28427 | 4.00E-05 | 0.007567 |
| PIM3     | 102.271 | 72.8913 | 35.2757  | 30.0954  | 1.40306  | 4.14E-05 | 0.007567 |
| CBFA2T2  | 4.61685 | 6.53184 | 7.62927  | 8.47762  | -1.41478 | 4.17E-05 | 0.007567 |
| TMBIM1   | 143.58  | 88.5551 | 75.8034  | 60.2405  | 1.62136  | 3.84E-05 | 0.007567 |
| ISOC1    | 9.89178 | 7.36481 | 6.97677  | 7.41953  | 1.34311  | 3.74E-05 | 0.007567 |
| G3BP1    | 45.1002 | 53.5489 | 35.9459  | 36.8423  | -1.18733 | 4.32E-05 | 0.007678 |
| TUBB6    | 48.126  | 21.9564 | 8.73516  | 5.62042  | 2.1919   | 4.99E-05 | 0.008166 |
| DYNC1LI1 | 25.4363 | 18.6315 | 16.5985  | 14.9068  | 1.36523  | 4.74E-05 | 0.008166 |
| ANKRD1   | 1.29557 | 7.65277 | 0.029087 | 0.013701 | -5.90688 | 4.93E-05 | 0.008166 |
| STARD8   | 7.89747 | 2.78774 | 1.70121  | 1.19942  | 2.83293  | 5.06E-05 | 0.008166 |
| RNFT1    | 14.0041 | 9.91076 | 13.2013  | 12.6835  | 1.41302  | 4.85E-05 | 0.008166 |
| WDR55    | 17.0026 | 13.6333 | 13.1671  | 12.8723  | 1.24713  | 5.16E-05 | 0.008178 |
| TARBP1   | 11.608  | 18.1352 | 6.92527  | 9.03666  | -1.56231 | 5.31E-05 | 0.008266 |
| JAK2     | 67.0695 | 49.3438 | 12.5578  | 14.2716  | 1.35923  | 5.98E-05 | 0.008339 |
| MOBK12C  | 49.2747 | 36.6604 | 13.3707  | 14.1054  | 1.34408  | 5.49E-05 | 0.008339 |
| ADPRH    | 16.1164 | 11.3328 | 5.17739  | 4.51177  | 1.4221   | 5.81E-05 | 0.008339 |
| C20orf24 | 103.125 | 68.2134 | 51.7809  | 47.5778  | 1.51181  | 6.03E-05 | 0.008339 |
| ITPRIPL2 | 17.1756 | 8.22523 | 5.12343  | 4.1866   | 2.08816  | 5.82E-05 | 0.008339 |
| PCYT1A   | 27.4579 | 17.1315 | 14.3544  | 13.5603  | 1.60278  | 5.95E-05 | 0.008339 |
| APEX2    | 17.0887 | 11.5553 | 10.6839  | 10.6761  | 1.47887  | 5.82E-05 | 0.008339 |
| CAPZA1   | 143.929 | 111.049 | 87.7846  | 78.1115  | 1.29609  | 6.43E-05 | 0.00866  |
| PITPNA   | 29.4415 | 20.297  | 23.3443  | 20.084   | 1.45054  | 6.46E-05 | 0.00866  |
| PPP2R5C  | 57.1392 | 73.7339 | 77.5787  | 75.0073  | -1.29043 | 6.60E-05 | 0.00872  |
| TMUB2    | 29.974  | 24.5508 | 22.3236  | 21.4621  | 1.2209   | 6.74E-05 | 0.008774 |
| FAM115C  | 7.33737 | 10.4147 | 3.3244   | 4.16779  | -1.4194  | 7.11E-05 | 0.009056 |
| KCTD5    | 24.9283 | 17.2611 | 16.631   | 15.4377  | 1.44418  | 7.17E-05 | 0.009056 |
| TRANK1   | 61.0386 | 81.3681 | 14.5492  | 17.2671  | -1.33306 | 7.40E-05 | 0.009088 |
| RB1CC1   | 8.22175 | 11.2501 | 14.8721  | 15.7104  | -1.36833 | 7.40E-05 | 0.009088 |
| SFI1     | 11.8287 | 19.5179 | 20.4988  | 25.6009  | -1.65005 | 7.68E-05 | 0.009303 |
| ATG3     | 107.625 | 74.2667 | 47.4281  | 44.828   | 1.44917  | 8.31E-05 | 0.009526 |
| MYO1E    | 25.6076 | 13.718  | 5.85552  | 5.37094  | 1.86672  | 8.11E-05 | 0.009526 |

|           |         |         |         |         |          |          |          |
|-----------|---------|---------|---------|---------|----------|----------|----------|
| ZDHC5     | 34.1156 | 26.9561 | 25.0081 | 24.3361 | 1.2656   | 8.25E-05 | 0.009526 |
| SATB1     | 37.0527 | 57.5191 | 50.9986 | 63.8416 | -1.55236 | 8.26E-05 | 0.009526 |
| SP100     | 95.1179 | 109.601 | 31.8168 | 30.9725 | -1.15226 | 8.74E-05 | 0.009648 |
| CARD6     | 9.80947 | 6.51433 | 4.36872 | 3.89602 | 1.50583  | 8.59E-05 | 0.009648 |
| TUBA1B    | 311.268 | 188.022 | 133.591 | 121.518 | 1.65549  | 8.69E-05 | 0.009648 |
| JMJD6     | 17.9529 | 13.5753 | 14.075  | 12.772  | 1.32247  | 9.18E-05 | 0.009997 |
| STX17     | 13.0386 | 14.8817 | 7.00894 | 7.69842 | -1.14136 | 9.90E-05 | 0.010258 |
| RAB39     | 15.0193 | 10.036  | 1.81021 | 2.05358 | 1.49655  | 9.70E-05 | 0.010258 |
| TMEM165   | 40.6006 | 27.8242 | 27.506  | 23.9892 | 1.45918  | 0.0001   | 0.010258 |
| C14orf129 | 12.8045 | 9.07852 | 13.3274 | 10.6218 | 1.41042  | 9.96E-05 | 0.010258 |
| PDK1      | 6.43357 | 10.7106 | 7.99365 | 8.84281 | -1.6648  | 9.81E-05 | 0.010258 |
| PRIC285   | 115.81  | 135.359 | 6.55762 | 7.17604 | -1.16881 | 0.000105 | 0.010293 |
| PATL1     | 37.9862 | 31.7325 | 16.2454 | 16.3888 | 1.19707  | 0.000104 | 0.010293 |
| ADPGK     | 138.172 | 103.005 | 48.2041 | 46.2075 | 1.34141  | 0.000109 | 0.010293 |
| WARS      | 745.783 | 434.41  | 46.4452 | 74.7086 | 1.71677  | 0.000108 | 0.010293 |
| VPS37C    | 24.9596 | 15.6025 | 7.45661 | 5.51545 | 1.59972  | 0.000108 | 0.010293 |
| MPI       | 9.81122 | 14.4907 | 16.2962 | 17.9325 | -1.47695 | 0.000104 | 0.010293 |
| C9orf46   | 20.3329 | 13.9773 | 12.328  | 13.1115 | 1.45471  | 0.000107 | 0.010293 |
| ELP2      | 13.5506 | 16.6024 | 20.5505 | 22.1922 | -1.22522 | 0.000112 | 0.010298 |
| TNK2      | 58.6    | 80.6427 | 29.9886 | 30.7568 | -1.37616 | 0.000113 | 0.010298 |
| RAB18     | 37.0182 | 24.1367 | 21.3344 | 20.2683 | 1.53368  | 0.000113 | 0.010298 |
| RAPGEF6   | 22.7182 | 34.674  | 23.2265 | 25.4616 | -1.52627 | 0.000111 | 0.010298 |
| PVRL2     | 86.6844 | 53.0644 | 13.7028 | 6.81299 | 1.63357  | 0.000123 | 0.010795 |
| SLC31A2   | 173.293 | 100.729 | 23.9001 | 22.4383 | 1.7204   | 0.000123 | 0.010795 |
| RB1       | 35.4767 | 25.8382 | 16.5919 | 15.7181 | 1.37303  | 0.00012  | 0.010795 |
| SPHK1     | 45.2275 | 28.9707 | 8.04253 | 3.21381 | 1.56115  | 0.000128 | 0.010865 |
| PIGK      | 3.90718 | 5.90705 | 7.20455 | 7.46557 | -1.51185 | 0.000128 | 0.010865 |
| S100A11   | 804.93  | 471.152 | 299.544 | 224.96  | 1.70843  | 0.000128 | 0.010865 |
| FAM135A   | 8.67386 | 5.20987 | 3.37915 | 3.42486 | 1.66489  | 0.000125 | 0.010865 |
| CSRNP1    | 51.9781 | 41.3165 | 9.37826 | 8.40955 | 1.25805  | 0.000133 | 0.011045 |
| CD81      | 170.387 | 104.014 | 102.902 | 98.5605 | 1.63811  | 0.000133 | 0.011045 |
| PRKACB    | 23.1724 | 36.4489 | 43.3998 | 48.9745 | -1.57295 | 0.000137 | 0.011286 |
| CCDC66    | 5.88348 | 11.4868 | 10.2945 | 13.0439 | -1.95239 | 0.00014  | 0.011403 |
| NAT1      | 6.48933 | 4.60795 | 4.21871 | 3.68435 | 1.40829  | 0.000147 | 0.011791 |
| LOC374443 | 12.8845 | 18.5918 | 15.6263 | 19.3492 | -1.44295 | 0.000146 | 0.011791 |
| CNIH4     | 22.5449 | 16.7954 | 16.911  | 15.3883 | 1.34233  | 0.00015  | 0.011883 |
| ODF2L     | 15.1629 | 19.3939 | 6.25684 | 6.70386 | -1.27903 | 0.000154 | 0.011888 |
| SMARCA2   | 15.9163 | 20.6365 | 26.8871 | 28.9137 | -1.29656 | 0.000159 | 0.011888 |
| ST3GAL5   | 60.7545 | 41.0839 | 11.7871 | 12.3417 | 1.47879  | 0.00016  | 0.011888 |
| TRPV2     | 48.1291 | 33.4185 | 19.7465 | 20.187  | 1.44019  | 0.000162 | 0.011888 |
| C6orf145  | 12.0643 | 7.05904 | 4.08173 | 2.18265 | 1.70906  | 0.000154 | 0.011888 |



|           |         |         |         |         |          |          |          |
|-----------|---------|---------|---------|---------|----------|----------|----------|
| SEC61G    | 91.8841 | 61.1518 | 51.5597 | 45.2911 | 1.50256  | 0.00016  | 0.011888 |
| CD63      | 397.216 | 224.05  | 215.346 | 152.217 | 1.77289  | 0.000159 | 0.011888 |
| JAK1      | 87.2708 | 111.357 | 109.013 | 120.271 | -1.276   | 0.000162 | 0.011888 |
| CYTH4     | 84.0505 | 43.7224 | 59.7937 | 55.5317 | 1.92237  | 0.00016  | 0.011888 |
| TOP2B     | 19.2983 | 28.0136 | 52.2181 | 55.7135 | -1.4516  | 0.000171 | 0.012077 |
| AKIRIN2   | 45.3003 | 33.7406 | 20.5153 | 20.3107 | 1.3426   | 0.000168 | 0.012077 |
| ZNF302    | 9.20497 | 12.2042 | 13.6669 | 15.2121 | -1.32582 | 0.000173 | 0.012077 |
| DECR1     | 38.1698 | 28.7912 | 23.234  | 22.3315 | 1.32575  | 0.000169 | 0.012077 |
| CASP5     | 19.8141 | 6.16025 | 1.22268 | 1.70401 | 3.21645  | 0.000171 | 0.012077 |
| RSU1      | 28.9056 | 16.1202 | 19.0542 | 20.0268 | 1.79313  | 0.000172 | 0.012077 |
| ACBD5     | 13.7606 | 11.0142 | 9.01088 | 8.9896  | 1.24936  | 0.000175 | 0.012087 |
| C16orf7   | 16.3311 | 6.38056 | 10.1749 | 9.67175 | 2.55951  | 0.000177 | 0.012126 |
| LOC144438 | 8.62175 | 10.6207 | 10.8269 | 11.5891 | -1.23184 | 0.000178 | 0.012154 |
| HDAC4     | 5.94531 | 8.08323 | 5.80668 | 5.51269 | -1.3596  | 0.000183 | 0.012161 |
| WDR41     | 12.2111 | 7.23527 | 7.04953 | 5.8957  | 1.68772  | 0.000183 | 0.012161 |
| RELT      | 20.5657 | 12.8391 | 13.6019 | 11.5182 | 1.60181  | 0.000182 | 0.012161 |
| PREPL     | 3.15081 | 4.58229 | 8.85206 | 9.62218 | -1.45432 | 0.000194 | 0.012296 |
| PNPT1     | 35.4507 | 45.9104 | 4.37566 | 5.08221 | -1.29505 | 0.000198 | 0.012296 |
| ZBTB4     | 15.5612 | 21.7561 | 28.6527 | 30.1837 | -1.3981  | 0.000196 | 0.012296 |
| BTN3A3    | 57.8638 | 74.111  | 39.6453 | 47.6237 | -1.28078 | 0.000195 | 0.012296 |
| MYOF      | 25.3827 | 14.8025 | 4.66298 | 5.46428 | 1.71476  | 0.000195 | 0.012296 |
| TBC1D10B  | 21.9798 | 17.6473 | 18.1235 | 16.4846 | 1.24551  | 0.000189 | 0.012296 |
| RNF185    | 14.2386 | 12.121  | 11.9655 | 11.7331 | 1.17471  | 0.000189 | 0.012296 |
| TMEM138   | 16.5412 | 36.5009 | 17.224  | 15.3913 | -2.20667 | 0.000187 | 0.012296 |
| CAP1      | 209.785 | 146.493 | 177.471 | 166.264 | 1.43205  | 0.000197 | 0.012296 |
| KCNMB1    | 15.2423 | 7.126   | 2.34333 | 2.6418  | 2.13897  | 0.000201 | 0.01243  |
| GIMAP2    | 112.462 | 159.369 | 103.383 | 116.412 | -1.41709 | 0.000204 | 0.012496 |
| ASPHD2    | 14.1073 | 7.47648 | 3.47971 | 3.65996 | 1.88689  | 0.000207 | 0.012518 |
| FERMT3    | 129.604 | 91.3608 | 78.3353 | 69.8518 | 1.4186   | 0.000206 | 0.012518 |
| SLC35A1   | 13.0069 | 9.95491 | 20.0755 | 17.1177 | 1.30658  | 0.000212 | 0.012719 |
| MOV10     | 84.961  | 95.7449 | 14.0188 | 16.7448 | -1.12693 | 0.000223 | 0.012772 |
| FAM122C   | 5.40105 | 6.5342  | 1.95702 | 2.29994 | -1.2098  | 0.000224 | 0.012772 |
| NUDCD1    | 12.425  | 10.177  | 4.48909 | 4.31758 | 1.22089  | 0.000223 | 0.012772 |
| LOC647979 | 33.053  | 42.4683 | 57.8592 | 60.0725 | -1.28485 | 0.000221 | 0.012772 |
| GART      | 46.6015 | 32.5795 | 18.1698 | 18.6928 | 1.43039  | 0.000218 | 0.012772 |
| GLUL      | 396.912 | 201.346 | 92.5947 | 62.3056 | 1.97129  | 0.000227 | 0.012772 |
| RBM47     | 33.9694 | 18.9646 | 10.7598 | 8.63229 | 1.7912   | 0.000227 | 0.012772 |
| FMNL2     | 18.4368 | 7.84775 | 1.39627 | 1.33888 | 2.3493   | 0.00023  | 0.012772 |
| LUZP6     | 38.4045 | 32.272  | 30.9881 | 28.5143 | 1.19002  | 0.000229 | 0.012772 |
| MTPN      | 38.4045 | 32.272  | 30.9881 | 28.5143 | 1.19002  | 0.000229 | 0.012772 |
| HCCS      | 10.4876 | 7.63393 | 7.52071 | 7.56891 | 1.37381  | 0.000229 | 0.012772 |

|          |         |         |         |         |          |          |          |
|----------|---------|---------|---------|---------|----------|----------|----------|
| NANS     | 28.4846 | 17.4798 | 19.2243 | 17.6359 | 1.62957  | 0.00022  | 0.012772 |
| ELF4     | 54.9811 | 46.9401 | 20.066  | 18.5413 | 1.1713   | 0.000238 | 0.012843 |
| PPPDE2   | 16.6625 | 13.2515 | 8.03961 | 8.18579 | 1.25741  | 0.000234 | 0.012843 |
| USP6NL   | 23.3164 | 15.1146 | 4.19336 | 4.54576 | 1.54264  | 0.000239 | 0.012843 |
| MPP7     | 2.00124 | 3.56161 | 4.83189 | 5.9589  | -1.7797  | 0.000238 | 0.012843 |
| STX16    | 46.8213 | 62.5894 | 42.3045 | 44.1916 | -1.33677 | 0.000236 | 0.012843 |
| RRBP1    | 25.8296 | 19.8716 | 13.9999 | 11.3445 | 1.29982  | 0.000243 | 0.012927 |
| TGM2     | 28.8284 | 5.55969 | 1.93315 | 1.06339 | 5.18524  | 0.000243 | 0.012927 |
| CD86     | 77.1445 | 35.317  | 40.9256 | 23.9852 | 2.18435  | 0.000255 | 0.01347  |
| SQRDL    | 191.399 | 145.435 | 40.4593 | 39.3722 | 1.31604  | 0.000257 | 0.013489 |
| CCR1     | 312.435 | 161.458 | 34.8892 | 24.9785 | 1.93508  | 0.000265 | 0.013833 |
| GTF2B    | 49.3876 | 37.7916 | 23.6007 | 22.7348 | 1.30684  | 0.000269 | 0.013871 |
| CLIP4    | 5.67946 | 8.69353 | 11.1877 | 11.9347 | -1.5307  | 0.00027  | 0.013871 |
| TWF2     | 59.8096 | 39.9119 | 56.4561 | 49.9795 | 1.49854  | 0.000271 | 0.013871 |
| PLEK     | 300.816 | 166.265 | 64.4638 | 69.2024 | 1.80926  | 0.000272 | 0.013887 |
| POMP     | 61.8708 | 42.3667 | 24.3696 | 23.9403 | 1.46036  | 0.000276 | 0.013894 |
| TMED9    | 133.776 | 84.1507 | 84.9616 | 68.4958 | 1.58972  | 0.000276 | 0.013894 |
| EGLN1    | 2.90217 | 3.8523  | 7.97153 | 7.64704 | -1.32739 | 0.000283 | 0.013914 |
| BLOC1S2  | 40.7184 | 28.9585 | 22.7318 | 20.0515 | 1.40609  | 0.00028  | 0.013914 |
| FAM175A  | 8.73424 | 13.0888 | 9.8365  | 10.1453 | -1.49856 | 0.000282 | 0.013914 |
| KLF9     | 6.83745 | 8.88148 | 7.7866  | 8.18813 | -1.29895 | 0.000281 | 0.013914 |
| ADAR     | 215.11  | 243.331 | 66.6443 | 70.6895 | -1.13119 | 0.000293 | 0.013935 |
| GPBP1    | 59.6301 | 72.3812 | 29.9751 | 30.434  | -1.21384 | 0.000292 | 0.013935 |
| KIAA0586 | 2.40486 | 3.48496 | 4.77934 | 5.28776 | -1.44913 | 0.000293 | 0.013935 |
| UTRN     | 27.7602 | 36.0264 | 17.9208 | 20.5286 | -1.29777 | 0.000294 | 0.013935 |
| CD274    | 235.39  | 109.491 | 4.64701 | 7.02574 | 2.14986  | 0.000285 | 0.013935 |
| SPATA13  | 39.8858 | 49.9808 | 32.8691 | 35.1492 | -1.2531  | 0.000291 | 0.013935 |
| HLX      | 17.8258 | 10.3585 | 6.12371 | 4.83425 | 1.7209   | 0.000292 | 0.013935 |
| C15orf48 | 418.781 | 207.223 | 30.4137 | 12.5451 | 2.02092  | 0.000298 | 0.014036 |
| ELL2     | 8.64038 | 5.35512 | 3.75653 | 3.21636 | 1.61348  | 0.0003   | 0.014036 |
| DOK1     | 20.8712 | 13.2386 | 21.2891 | 16.8907 | 1.57654  | 0.000301 | 0.014041 |
| ATG14    | 3.48569 | 4.95079 | 6.41114 | 7.5554  | -1.42032 | 0.000307 | 0.014229 |
| BTBD11   | 6.57746 | 10.3398 | 7.7653  | 8.75166 | -1.57201 | 0.000311 | 0.014346 |
| CDKN1A   | 547.332 | 240.252 | 32.2724 | 25.9222 | 2.27816  | 0.000315 | 0.014443 |
| GIMAP6   | 113.878 | 145.548 | 64.3015 | 71.7488 | -1.2781  | 0.00032  | 0.014596 |
| TMPO     | 29.5794 | 40.6552 | 39.7767 | 41.9291 | -1.37444 | 0.000323 | 0.014685 |
| TRIM44   | 29.1203 | 37.7649 | 22.4466 | 26.6019 | -1.29686 | 0.000329 | 0.014802 |
| LONRF1   | 9.14924 | 5.6548  | 3.72361 | 3.76503 | 1.61796  | 0.000328 | 0.014802 |
| DENND1A  | 13.0861 | 9.53398 | 7.75227 | 7.75702 | 1.37258  | 0.000335 | 0.014963 |
| VCP      | 92.3171 | 80.5063 | 58.6975 | 55.7186 | 1.14671  | 0.000342 | 0.015029 |
| GGNBP2   | 20.5296 | 24.1    | 27.5734 | 29.5935 | -1.17391 | 0.000342 | 0.015029 |

|          |         |         |         |         |          |          |          |
|----------|---------|---------|---------|---------|----------|----------|----------|
| TAF8     | 9.38083 | 12.2207 | 7.95648 | 8.73735 | -1.30274 | 0.000343 | 0.015029 |
| ARL6IP1  | 78.6474 | 61.1348 | 67.9236 | 61.4461 | 1.28646  | 0.000342 | 0.015029 |
| BTK      | 47.3086 | 30.928  | 28.8807 | 25.4588 | 1.52964  | 0.000355 | 0.015469 |
| ZNF395   | 5.76421 | 10.1682 | 17.6908 | 18.8732 | -1.76402 | 0.000359 | 0.015569 |
| GTF2E2   | 26.292  | 21.3012 | 16.0165 | 14.7725 | 1.2343   | 0.000365 | 0.015731 |
| SELS     | 55.7608 | 37.6533 | 21.8926 | 19.4119 | 1.4809   | 0.00037  | 0.015731 |
| ZBTB7B   | 25.8259 | 16.6481 | 33.9358 | 26.3089 | 1.55128  | 0.00037  | 0.015731 |
| PTTG1IP  | 77.822  | 48.2452 | 58.4332 | 47.8242 | 1.61305  | 0.000367 | 0.015731 |
| TBC1D1   | 23.3386 | 28.3099 | 12.4008 | 12.1312 | -1.21301 | 0.000378 | 0.015893 |
| ORC5     | 4.82582 | 6.04247 | 7.53518 | 8.28585 | -1.25211 | 0.000379 | 0.015893 |
| LAT2     | 50.4886 | 20.8746 | 47.3175 | 38.2267 | 2.41866  | 0.000379 | 0.015893 |
| UBE2W    | 13.5304 | 8.1796  | 7.71591 | 7.45888 | 1.65417  | 0.000382 | 0.015923 |
| DYNLRB1  | 74.3223 | 62.8428 | 60.1356 | 54.7971 | 1.18267  | 0.000389 | 0.016102 |
| RGS19    | 37.2462 | 22.5513 | 37.2381 | 33.3114 | 1.65163  | 0.00039  | 0.016102 |
| SERPING1 | 350.52  | 212.266 | 8.1986  | 13.7312 | 1.65133  | 0.000404 | 0.016605 |
| NFKBIE   | 59.1621 | 40.5145 | 20.3117 | 17.6304 | 1.46027  | 0.000407 | 0.016654 |
| MATR3    | 59.6366 | 70.1549 | 66.2121 | 68.9161 | -1.17637 | 0.000409 | 0.016673 |
| KIAA1143 | 5.33141 | 7.49168 | 8.89684 | 9.59018 | -1.4052  | 0.00042  | 0.017019 |
| GPR155   | 18.0586 | 26.1446 | 7.3656  | 7.74588 | -1.44776 | 0.000425 | 0.017065 |
| VIM      | 662.912 | 364.361 | 322.043 | 232.127 | 1.81938  | 0.000423 | 0.017065 |
| PLEKHO1  | 284.537 | 195.794 | 122.839 | 115.575 | 1.45325  | 0.000429 | 0.017142 |
| RBBP6    | 22.5944 | 25.8983 | 15.8272 | 17.5901 | -1.14623 | 0.000434 | 0.017254 |
| TMEM55A  | 4.66801 | 3.30475 | 6.36274 | 5.6132  | 1.41251  | 0.000436 | 0.017258 |
| MTHFD2   | 103.019 | 75.0089 | 24.4535 | 20.0398 | 1.37342  | 0.000439 | 0.017313 |
| STK40    | 30.186  | 23.5816 | 23.7484 | 21.6695 | 1.28007  | 0.000442 | 0.017346 |
| HERC5    | 195.836 | 233.799 | 7.11018 | 6.79944 | -1.19386 | 0.000449 | 0.017486 |
| SMCHD1   | 90.9351 | 122.94  | 39.3795 | 42.9157 | -1.35196 | 0.000449 | 0.017486 |
| DDX58    | 140.316 | 165.606 | 10.2117 | 12.0699 | -1.18024 | 0.000457 | 0.017599 |
| ZNF839   | 2.70169 | 3.58102 | 5.09205 | 5.83236 | -1.32548 | 0.000458 | 0.017599 |
| SEC61B   | 123.341 | 88.7698 | 87.9217 | 73.4714 | 1.38944  | 0.000456 | 0.017599 |
| JMY      | 1.67064 | 3.09496 | 5.08703 | 5.80364 | -1.85255 | 0.000463 | 0.017686 |
| WDR89    | 6.7898  | 9.13115 | 9.88661 | 11.3    | -1.34483 | 0.000466 | 0.017739 |
| APOL2    | 146.871 | 106.917 | 19.1925 | 23.215  | 1.37369  | 0.000475 | 0.017818 |
| ACVR1B   | 8.98595 | 5.20221 | 6.19151 | 5.3317  | 1.72734  | 0.000476 | 0.017818 |
| KCTD12   | 66.0681 | 25.0205 | 38.2097 | 31.5792 | 2.64056  | 0.000472 | 0.017818 |
| CUL4B    | 14.58   | 20.1599 | 16.5437 | 18.1908 | -1.38271 | 0.000476 | 0.017818 |
| DDX60L   | 89.8475 | 108.497 | 9.49434 | 10.3208 | -1.20757 | 0.000486 | 0.01787  |
| DENND1B  | 22.6276 | 15.7843 | 3.74993 | 3.73185 | 1.43355  | 0.000486 | 0.01787  |
| CDK17    | 19.1682 | 22.9557 | 13.0845 | 13.5897 | -1.19759 | 0.000485 | 0.01787  |
| CDS2     | 33.9602 | 21.2746 | 17.2782 | 14.9907 | 1.59628  | 0.000482 | 0.01787  |
| THUMPD1  | 15.5136 | 19.6216 | 17.3792 | 19.609  | -1.2648  | 0.000492 | 0.018021 |

|          |         |         |          |          |          |          |          |
|----------|---------|---------|----------|----------|----------|----------|----------|
| FAM177A1 | 15.1684 | 8.81005 | 4.05029  | 4.00286  | 1.72172  | 0.000498 | 0.018097 |
| CXCL9    | 661.151 | 218.694 | 7.11937  | 21.6056  | 3.02318  | 0.000497 | 0.018097 |
| SDC4     | 21.5006 | 8.78102 | 4.06889  | 3.39659  | 2.44853  | 0.000503 | 0.018191 |
| IFNA2    | 14.6714 | 46.9757 | 0.044937 | 0.017489 | -3.20186 | 0.000535 | 0.019174 |
| PDIA3P   | 25.5483 | 13.3659 | 9.81016  | 8.49256  | 1.91145  | 0.000534 | 0.019174 |
| TUBA1A   | 99.8304 | 47.6763 | 58.8484  | 50.2478  | 2.09392  | 0.000539 | 0.019174 |
| TSFM     | 9.98765 | 6.73211 | 7.43205  | 7.5522   | 1.48358  | 0.000537 | 0.019174 |
| KCNN4    | 39.6325 | 9.50921 | 15.2851  | 7.60888  | 4.1678   | 0.000542 | 0.019188 |
| TRAPPC2  | 4.74542 | 6.21    | 7.54721  | 8.04522  | -1.30863 | 0.000556 | 0.019624 |
| ALAS1    | 52.0851 | 30.5631 | 16.7895  | 15.0948  | 1.70418  | 0.000567 | 0.019874 |
| ANXA11   | 87.2816 | 58.4884 | 77.0578  | 76.1522  | 1.49229  | 0.000568 | 0.019874 |
| MLX      | 28.841  | 23.003  | 25.7958  | 24.0985  | 1.25379  | 0.000578 | 0.020139 |
| IFNB1    | 30.9528 | 87.3793 | 0.097761 | 0.109296 | -2.82298 | 0.000587 | 0.020348 |
| PLIN3    | 35.8842 | 21.416  | 27.9612  | 19.0514  | 1.67558  | 0.000588 | 0.020348 |
| C9orf167 | 20.2903 | 12.5608 | 8.91064  | 7.37883  | 1.61537  | 0.000591 | 0.020354 |
| RG9MTD3  | 4.21891 | 5.34923 | 6.23476  | 7.07489  | -1.26792 | 0.000597 | 0.020475 |
| EMP1     | 141.277 | 41.9003 | 15.6196  | 4.56519  | 3.37174  | 0.000606 | 0.020701 |
| DNAJC7   | 50.4999 | 41.1321 | 33.6725  | 31.8093  | 1.22775  | 0.000609 | 0.020744 |
| TTC9C    | 16.6678 | 13.0325 | 15.2932  | 13.9592  | 1.27894  | 0.000617 | 0.02088  |
| SHKBP1   | 59.0268 | 46.2636 | 52.5841  | 48.7858  | 1.27588  | 0.000618 | 0.02088  |
| FKBP1A   | 84.1322 | 53.4928 | 83.5179  | 75.7137  | 1.57278  | 0.000626 | 0.021062 |
| PGAP1    | 9.8598  | 12.7391 | 1.02696  | 1.05595  | -1.29202 | 0.000634 | 0.021263 |
| PCMTD2   | 15.8786 | 24.599  | 29.4827  | 33.644   | -1.54919 | 0.000639 | 0.021273 |
| EDEM2    | 26.4375 | 16.9105 | 20.784   | 19.5278  | 1.56337  | 0.000637 | 0.021273 |
| STX18    | 11.6969 | 9.26935 | 9.38776  | 9.4279   | 1.26189  | 0.000645 | 0.021385 |
| NR1D2    | 11.1768 | 15.472  | 16.2902  | 17.5058  | -1.3843  | 0.000649 | 0.021435 |
| C11orf57 | 7.89539 | 10.3171 | 10.6191  | 11.0653  | -1.30673 | 0.000658 | 0.021654 |
| LSM14A   | 31.6222 | 36.7033 | 46.1314  | 46.6593  | -1.16068 | 0.000675 | 0.021685 |
| SFT2D2   | 31.507  | 22.1577 | 6.80862  | 7.11803  | 1.42194  | 0.000671 | 0.021685 |
| CRTC3    | 14.7119 | 19.6261 | 22.5806  | 23.0269  | -1.33403 | 0.000672 | 0.021685 |
| CHMP2B   | 18.0284 | 15.6034 | 14.831   | 13.8105  | 1.15541  | 0.000672 | 0.021685 |
| IFNW1    | 9.85974 | 29.9337 | 0.016511 | 0.02452  | -3.03595 | 0.000674 | 0.021685 |
| IFNA14   | 16.7727 | 53.4637 | 0.037198 | 0.05301  | -3.18754 | 0.00067  | 0.021685 |
| GOS2     | 11.9587 | 3.14526 | 1.04973  | 1.28432  | 3.80214  | 0.000677 | 0.021685 |
| C18orf10 | 13.4027 | 8.90847 | 11.375   | 8.96539  | 1.50449  | 0.000686 | 0.021837 |
| INSIG1   | 51.0115 | 24.0127 | 33.9724  | 32.3633  | 2.12436  | 0.000686 | 0.021837 |
| MDM1     | 3.67929 | 5.54645 | 8.18663  | 8.56977  | -1.50748 | 0.000695 | 0.022025 |
| IL29     | 10.3912 | 30.648  | 0.155022 | 0.219202 | -2.94942 | 0.000703 | 0.022039 |
| ARF1     | 203.373 | 167.247 | 158.552  | 144.256  | 1.21601  | 0.000701 | 0.022039 |
| ZNF766   | 11.8879 | 14.5108 | 11.3033  | 12.0457  | -1.22064 | 0.000699 | 0.022039 |
| EHD4     | 84.3523 | 70.616  | 18.5312  | 15.9305  | 1.19452  | 0.000707 | 0.02208  |

|               |         |         |          |          |          |          |          |
|---------------|---------|---------|----------|----------|----------|----------|----------|
| AGPAT2        | 23.6176 | 13.3437 | 15.5042  | 11.9943  | 1.76994  | 0.000712 | 0.022156 |
| DNASE1L1      | 9.92229 | 6.92887 | 9.05382  | 7.35586  | 1.43202  | 0.000716 | 0.022224 |
| LRRCS9        | 36.1603 | 27.0224 | 20.0933  | 19.8463  | 1.33816  | 0.000727 | 0.022474 |
| ZC3H13        | 8.80028 | 11.3511 | 11.1235  | 13.3557  | -1.28986 | 0.000735 | 0.022643 |
| NEXN          | 16.8071 | 21.9485 | 0.35709  | 0.585229 | -1.30591 | 0.000743 | 0.022644 |
| C6orf192      | 14.3385 | 19.7553 | 8.7122   | 8.22934  | -1.37778 | 0.000751 | 0.022644 |
| PCNX          | 25.2248 | 18.0117 | 12.2061  | 11.4221  | 1.40047  | 0.000745 | 0.022644 |
| CD53          | 455.897 | 329.747 | 240.503  | 227.152  | 1.38256  | 0.000749 | 0.022644 |
| IFNA21        | 14.493  | 49.527  | 0.039536 | 0.051316 | -3.41731 | 0.000749 | 0.022644 |
| TSPAN14       | 39.6169 | 27.3934 | 37.3942  | 35.3436  | 1.44622  | 0.000747 | 0.022644 |
| COQ10B        | 28.2169 | 23.901  | 13.8744  | 14.1071  | 1.18057  | 0.000774 | 0.022831 |
| PSMB5         | 30.5571 | 23.9448 | 19.4351  | 17.3315  | 1.27615  | 0.000768 | 0.022831 |
| SIDT1         | 12.2147 | 17.2874 | 7.75119  | 8.91004  | -1.41529 | 0.000777 | 0.022831 |
| SLC39A1       | 48.7267 | 34.2844 | 29.3531  | 22.3417  | 1.42125  | 0.00077  | 0.022831 |
| IFNA22P       | 4.67347 | 14.7613 | 0.01433  | 0.041314 | -3.15853 | 0.000765 | 0.022831 |
| IFNA17        | 9.7174  | 36.8992 | 0.014141 | 0.028099 | -3.79723 | 0.000778 | 0.022831 |
| ACTR10        | 19.8069 | 15.7588 | 15.7925  | 14.9876  | 1.25688  | 0.00076  | 0.022831 |
| EHBP1L1       | 51.0443 | 36.9219 | 42.039   | 36.0704  | 1.38249  | 0.000775 | 0.022831 |
| ACSS2         | 9.65904 | 5.22383 | 11.0774  | 10.2321  | 1.84903  | 0.000782 | 0.022861 |
| ZNF136        | 6.96058 | 8.25441 | 6.78522  | 7.55558  | -1.18588 | 0.000789 | 0.023    |
| SBNO2         | 66.8601 | 49.5289 | 30.538   | 24.6171  | 1.34992  | 0.000798 | 0.023089 |
| LOC728743     | 15.6952 | 22.0499 | 13.1461  | 13.9577  | -1.40488 | 0.000803 | 0.023089 |
| ATXN1L        | 9.13143 | 10.2822 | 10.1308  | 10.8821  | -1.12602 | 0.000806 | 0.023089 |
| GNB2          | 102.847 | 79.9623 | 75.7914  | 70.2746  | 1.2862   | 0.000797 | 0.023089 |
| LTBR          | 30.7238 | 16.9762 | 15.6304  | 11.311   | 1.80982  | 0.000803 | 0.023089 |
| SEC23A        | 16.6849 | 13.8545 | 14.1067  | 13.8616  | 1.20429  | 0.000808 | 0.023089 |
| NDUFC2-KCTD14 | 10.0607 | 6.04696 | 0.181998 | 0.289356 | 1.66377  | 0.000812 | 0.023122 |
| HINT3         | 9.72952 | 7.77644 | 7.85913  | 7.54208  | 1.25115  | 0.000816 | 0.023162 |
| CHMP5         | 73.3778 | 61.7146 | 19.7664  | 18.8842  | 1.18899  | 0.000834 | 0.023222 |
| HPS4          | 5.90092 | 7.29036 | 8.96496  | 9.74102  | -1.23546 | 0.000831 | 0.023222 |
| NIPSNAP1      | 10.3282 | 14.7347 | 18.3615  | 19.4245  | -1.42665 | 0.000832 | 0.023222 |
| KEAP1         | 28.253  | 21.8554 | 17.7419  | 15.0439  | 1.29273  | 0.00083  | 0.023222 |
| TTC7B         | 7.15651 | 3.85908 | 1.15558  | 1.11393  | 1.85446  | 0.000828 | 0.023222 |
| PLEKHA7       | 8.80985 | 3.02889 | 1.16575  | 1.24486  | 2.90861  | 0.00083  | 0.023222 |
| PIK3R1        | 12.4052 | 19.6231 | 30.1066  | 34.0921  | -1.58185 | 0.000842 | 0.02331  |
| SYNE1         | 27.7302 | 40.4961 | 31.251   | 38.1508  | -1.46036 | 0.000842 | 0.02331  |
| IFNA4         | 6.3714  | 27.6071 | 0        | 0.010616 | -4.33298 | 0.000846 | 0.023344 |
| STK3          | 8.07519 | 5.90264 | 2.53757  | 2.31923  | 1.36807  | 0.00086  | 0.023581 |
| FAM117A       | 18.2877 | 27.3873 | 32.4271  | 35.812   | -1.49758 | 0.000859 | 0.023581 |
| SPPL2A        | 132.915 | 97.8567 | 28.1547  | 25.2853  | 1.35826  | 0.000871 | 0.023608 |
| GNAI3         | 33.282  | 25.4302 | 17.4305  | 16.4198  | 1.30876  | 0.000872 | 0.023608 |

|           |         |         |          |          |          |          |          |
|-----------|---------|---------|----------|----------|----------|----------|----------|
| SRRM1     | 18.0761 | 22.7067 | 22.5181  | 25.9545  | -1.25618 | 0.000882 | 0.023608 |
| WHAMM     | 10.8049 | 13.5437 | 9.81355  | 10.3888  | -1.25348 | 0.000879 | 0.023608 |
| BCL2L1    | 36.1102 | 17.5753 | 12.3027  | 12.7009  | 2.0546   | 0.000883 | 0.023608 |
| TIFA      | 17.5925 | 10.062  | 8.23094  | 9.16335  | 1.74841  | 0.000878 | 0.023608 |
| CAPN1     | 41.8741 | 34.3185 | 35.0688  | 32.6926  | 1.22016  | 0.000883 | 0.023608 |
| BTN3A1    | 68.2316 | 85.1305 | 75.8995  | 86.0019  | -1.24767 | 0.00087  | 0.023608 |
| C5orf15   | 43.9976 | 32.7318 | 19.8166  | 19.8959  | 1.34418  | 0.000903 | 0.023932 |
| TYMP      | 609.891 | 387.61  | 166.285  | 156.082  | 1.57347  | 0.000903 | 0.023932 |
| TNFRSF10A | 12.4663 | 8.38018 | 8.42356  | 8.7676   | 1.4876   | 0.000902 | 0.023932 |
| SUMF2     | 26.2094 | 33.8424 | 49.1988  | 51.6903  | -1.29123 | 0.000907 | 0.023945 |
| NCOA2     | 12.9053 | 16.752  | 9.70026  | 10.7062  | -1.29807 | 0.000916 | 0.02413  |
| KDM1B     | 13.6567 | 9.30667 | 5.48823  | 5.86285  | 1.46741  | 0.000923 | 0.024181 |
| SLC44A2   | 40.8799 | 55.7704 | 63.7711  | 64.873   | -1.36425 | 0.000927 | 0.024181 |
| ZNF91     | 3.45942 | 4.84056 | 4.85768  | 5.19823  | -1.39924 | 0.000924 | 0.024181 |
| UNKL      | 5.06109 | 7.21248 | 9.77111  | 11.4826  | -1.42509 | 0.000936 | 0.024209 |
| ANXA5     | 471.402 | 299.733 | 169.121  | 123.556  | 1.57274  | 0.000944 | 0.024209 |
| TFE3      | 36.8335 | 28.34   | 23.9897  | 20.3116  | 1.2997   | 0.000943 | 0.024209 |
| NKIRAS2   | 23.6432 | 17.5266 | 15.0631  | 13.14    | 1.34899  | 0.000942 | 0.024209 |
| IFNA1     | 13.9931 | 43.5312 | 0.021877 | 0.014197 | -3.1109  | 0.000931 | 0.024209 |
| C11orf75  | 50.0373 | 24.2108 | 12.8912  | 14.9097  | 2.06674  | 0.00094  | 0.024209 |
| E2F3      | 12.8282 | 16.3321 | 12.8713  | 14.3898  | -1.27315 | 0.000951 | 0.024308 |
| PHF10     | 11.3205 | 17.9032 | 32.9599  | 34.9355  | -1.58149 | 0.000974 | 0.024559 |
| RP2       | 25.4225 | 19.9214 | 13.3282  | 11.1477  | 1.27613  | 0.000972 | 0.024559 |
| TPM4      | 160.765 | 117.413 | 72.6228  | 63.7814  | 1.36922  | 0.000966 | 0.024559 |
| RAB5A     | 38.8066 | 27.7127 | 22.2446  | 20.6339  | 1.40032  | 0.000972 | 0.024559 |
| EZH2      | 7.74862 | 4.92551 | 5.22527  | 4.55586  | 1.57316  | 0.000975 | 0.024559 |
| ERCC5     | 16.1385 | 20.6754 | 27.8832  | 29.054   | -1.28112 | 0.000978 | 0.024568 |
| PLK1S1    | 3.29786 | 5.38149 | 10.367   | 11.3163  | -1.63181 | 0.000989 | 0.024771 |
| SRPK2     | 8.37008 | 11.4089 | 18.0698  | 17.6709  | -1.36306 | 0.000993 | 0.024792 |
| GSTM4     | 1.52766 | 4.40912 | 4.36872  | 10.0119  | -2.8862  | 0.001005 | 0.025023 |
| FTSJD2    | 73.9652 | 86.4518 | 20.2334  | 21.0356  | -1.16882 | 0.001012 | 0.025045 |
| RECQL5    | 6.10318 | 7.888   | 7.88499  | 8.70481  | -1.29244 | 0.001013 | 0.025045 |
| GK        | 15.7863 | 7.96328 | 6.34552  | 5.32345  | 1.98239  | 0.001014 | 0.025045 |
| HM13      | 143.872 | 93.4752 | 63.9164  | 49.8822  | 1.53915  | 0.001029 | 0.025254 |
| UTP14C    | 6.34664 | 7.1265  | 6.71117  | 7.00408  | -1.12288 | 0.001029 | 0.025254 |
| BCL10     | 11.4536 | 9.4622  | 7.40724  | 7.75301  | 1.21046  | 0.001036 | 0.025268 |
| RILP      | 13.2226 | 7.78145 | 4.30296  | 3.47747  | 1.69924  | 0.001034 | 0.025268 |
| ZNF160    | 6.41582 | 8.11795 | 8.60118  | 9.31956  | -1.2653  | 0.001038 | 0.025268 |
| DHDDS     | 8.5449  | 7.01437 | 6.44157  | 6.16492  | 1.2182   | 0.001044 | 0.025268 |
| OMA1      | 7.71464 | 10.5488 | 10.8611  | 11.6893  | -1.36737 | 0.001042 | 0.025268 |
| DDIT3     | 39.1452 | 28.5017 | 16.4606  | 16.4426  | 1.37343  | 0.001072 | 0.025829 |



|          |         |         |          |          |          |          |          |
|----------|---------|---------|----------|----------|----------|----------|----------|
| DEDD     | 21.0588 | 17.9846 | 18.7658  | 17.1407  | 1.17094  | 0.001073 | 0.025829 |
| IL4I1    | 480.185 | 360.754 | 17.1431  | 9.34134  | 1.33106  | 0.001091 | 0.025867 |
| ZRANB1   | 7.58954 | 9.14227 | 12.2676  | 12.3387  | -1.20459 | 0.001087 | 0.025867 |
| ARL8A    | 37.7215 | 27.5909 | 15.8872  | 14.3346  | 1.36717  | 0.001088 | 0.025867 |
| IFNA8    | 14.0487 | 48.9222 | 0.012082 | 0.048173 | -3.48232 | 0.001083 | 0.025867 |
| FGL2     | 338.609 | 185.523 | 120.473  | 121.409  | 1.82516  | 0.001095 | 0.025867 |
| GLRX     | 144.858 | 80.2705 | 64.9789  | 61.0126  | 1.80462  | 0.001095 | 0.025867 |
| CYB561   | 5.62883 | 8.71106 | 7.3268   | 9.14097  | -1.54758 | 0.001084 | 0.025867 |
| TTC35    | 30.8165 | 23.3489 | 14.9503  | 13.8101  | 1.31983  | 0.00112  | 0.026232 |
| UBE2A    | 51.5436 | 38.4993 | 25.2223  | 22.4914  | 1.33882  | 0.00112  | 0.026232 |
| IFNA5    | 14.8629 | 60.0775 | 0.044403 | 0.055211 | -4.0421  | 0.001118 | 0.026232 |
| SLC25A45 | 5.13427 | 7.68456 | 8.33117  | 11.6899  | -1.49672 | 0.00113  | 0.026235 |
| URGCP    | 4.14851 | 5.43909 | 6.34518  | 6.60849  | -1.31109 | 0.001134 | 0.026235 |
| HIATL1   | 32.7801 | 26.9874 | 22.7082  | 22.2049  | 1.21464  | 0.001138 | 0.026235 |
| LRRFIP1  | 63.2833 | 49.7838 | 45.7271  | 38.8768  | 1.27116  | 0.001134 | 0.026235 |
| CD96     | 22.0477 | 34.7623 | 29.5932  | 38.0307  | -1.57669 | 0.001132 | 0.026235 |
| CMAH     | 14.022  | 8.34481 | 7.35894  | 8.07014  | 1.68033  | 0.001136 | 0.026235 |
| PTPRE    | 83.304  | 40.5247 | 25.8586  | 24.0712  | 2.05564  | 0.001143 | 0.026284 |
| DPH3     | 9.17348 | 7.68744 | 7.01204  | 6.47286  | 1.19331  | 0.00115  | 0.026311 |
| IFNA16   | 9.87903 | 36.0726 | 0.020307 | 0.023435 | -3.65143 | 0.001153 | 0.026311 |
| ZNF675   | 5.20482 | 6.86785 | 6.57397  | 7.00878  | -1.31952 | 0.001152 | 0.026311 |
| CASP7    | 50.6479 | 34.1684 | 9.71494  | 10.0662  | 1.4823   | 0.001162 | 0.026377 |
| SLC4A2   | 27.1018 | 21.8228 | 22.2947  | 18.8229  | 1.2419   | 0.001162 | 0.026377 |
| ABCG1    | 18.6682 | 6.79342 | 9.38619  | 5.25591  | 2.74798  | 0.00117  | 0.026482 |
| C12orf44 | 18.446  | 15.0765 | 17.01    | 15.5651  | 1.22349  | 0.001181 | 0.026671 |
| BATF2    | 38.8343 | 26.1574 | 0.877302 | 2.87528  | 1.48464  | 0.00119  | 0.026742 |
| MTMR6    | 17.0499 | 11.6002 | 12.3681  | 12.206   | 1.46979  | 0.00119  | 0.026742 |
| SLC25A25 | 15.4434 | 10.2324 | 9.14973  | 8.85888  | 1.50927  | 0.001203 | 0.026955 |
| PHF3     | 16.6276 | 21.5317 | 24.0194  | 25.6271  | -1.29493 | 0.001209 | 0.027013 |
| NPIP     | 9.051   | 15.2419 | 21.7061  | 24.708   | -1.684   | 0.001235 | 0.027482 |
| CTNS     | 9.43206 | 6.43944 | 7.4966   | 6.67138  | 1.46473  | 0.001236 | 0.027482 |
| FBXO6    | 96.8883 | 79.9643 | 7.48983  | 9.57759  | 1.21164  | 0.00127  | 0.027676 |
| C17orf62 | 100.008 | 82.4767 | 72.6129  | 64.0019  | 1.21256  | 0.00127  | 0.027676 |
| C4orf32  | 17.6119 | 10.2262 | 4.55495  | 5.73766  | 1.72224  | 0.001258 | 0.027676 |
| GVINP1   | 21.6054 | 28.28   | 16.2471  | 21.5968  | -1.30893 | 0.001258 | 0.027676 |
| AKT2     | 30.2769 | 35.3866 | 29.0875  | 28.9475  | -1.16877 | 0.00127  | 0.027676 |
| CISH     | 64.6099 | 25.6955 | 16.8938  | 20.6383  | 2.51444  | 0.001267 | 0.027676 |
| CHD6     | 6.50744 | 9.21502 | 8.98462  | 9.93421  | -1.41608 | 0.001264 | 0.027676 |
| IFNG     | 59.7028 | 7.82318 | 0.551001 | 0.764432 | 7.63152  | 0.001273 | 0.027676 |
| SIN3A    | 17.1985 | 21.9113 | 20.4166  | 21.2869  | -1.27402 | 0.001266 | 0.027676 |
| TOR1A    | 34.0676 | 24.4733 | 22.3602  | 19.2912  | 1.39203  | 0.001287 | 0.027828 |

|          |         |         |          |          |          |          |          |
|----------|---------|---------|----------|----------|----------|----------|----------|
| STAG2    | 33.9862 | 40.2108 | 35.4304  | 37.2335  | -1.18315 | 0.001284 | 0.027828 |
| TIA1     | 30.0987 | 39.669  | 26.1943  | 28.0044  | -1.31796 | 0.001294 | 0.027911 |
| BLVRA    | 131.851 | 78.7344 | 25.0261  | 18.0109  | 1.67463  | 0.001305 | 0.028092 |
| CNOT6L   | 12.5108 | 17.4847 | 21.0784  | 22.0349  | -1.39757 | 0.001311 | 0.028141 |
| C5orf39  | 35.1392 | 46.8589 | 24.5739  | 29.0532  | -1.33352 | 0.001317 | 0.028205 |
| IFNA7    | 10.0325 | 33.9418 | 0.013504 | 0.052801 | -3.38317 | 0.001321 | 0.028212 |
| YME1L1   | 55.6068 | 50.7752 | 40.8338  | 40.36    | 1.09516  | 0.001324 | 0.02822  |
| LAMTOR3  | 10.9881 | 8.58655 | 8.53066  | 8.73524  | 1.27968  | 0.001332 | 0.028309 |
| PATZ1    | 11.4349 | 15.5478 | 15.195   | 17.9691  | -1.35969 | 0.001335 | 0.028311 |
| SERPINB8 | 16.5901 | 10.8736 | 10.223   | 9.71307  | 1.52572  | 0.001341 | 0.028362 |
| GRINL1A  | 11.8326 | 14.9366 | 13.3968  | 15.1733  | -1.26232 | 0.001348 | 0.028445 |
| ARF3     | 51.8513 | 39.0465 | 48.053   | 41.8166  | 1.32794  | 0.001353 | 0.028494 |
| SLC9A8   | 7.94049 | 8.95931 | 6.28815  | 6.81724  | -1.12831 | 0.001358 | 0.028526 |
| IFNA13   | 3.91625 | 12.2702 | 0        | 0.01185  | -3.13316 | 0.001372 | 0.028738 |
| ZFP62    | 4.75479 | 6.44141 | 8.74436  | 9.39725  | -1.35472 | 0.001389 | 0.028885 |
| MGAT2    | 41.3282 | 32.0992 | 23.2788  | 21.7429  | 1.28752  | 0.001386 | 0.028885 |
| CPEB4    | 8.11911 | 5.91321 | 4.89934  | 4.38515  | 1.37305  | 0.001383 | 0.028885 |
| TUT1     | 6.66245 | 8.8912  | 10.8464  | 12.2328  | -1.33452 | 0.001418 | 0.029069 |
| ATXN7L3B | 27.5056 | 36.0853 | 39.3228  | 45.0756  | -1.31193 | 0.001407 | 0.029069 |
| C15orf24 | 44.0519 | 34.1499 | 29.1802  | 25.5498  | 1.28996  | 0.001422 | 0.029069 |
| ANXA2    | 441.73  | 285.649 | 216.605  | 169.438  | 1.54641  | 0.001424 | 0.029069 |
| PHF23    | 24.761  | 20.451  | 27.6802  | 24.14    | 1.21075  | 0.001421 | 0.029069 |
| TAX1BP1  | 54.6667 | 46.8622 | 47.0362  | 45.4992  | 1.16654  | 0.001406 | 0.029069 |
| LEPROT   | 19.8645 | 14.7101 | 15.7304  | 14.7675  | 1.3504   | 0.001409 | 0.029069 |
| PQLC1    | 21.0361 | 15.3322 | 19.8995  | 17.8076  | 1.37202  | 0.001421 | 0.029069 |
| CTNNA1   | 57.2324 | 40.5264 | 30.1886  | 23.5559  | 1.41223  | 0.001432 | 0.029094 |
| LRRN3    | 10.7267 | 31.5223 | 14.4484  | 34.4598  | -2.93868 | 0.00143  | 0.029094 |
| ARHGAP10 | 21.1038 | 10.2384 | 6.52949  | 5.87352  | 2.06125  | 0.001437 | 0.029134 |
| PSME2    | 462.077 | 345.163 | 104.64   | 130.788  | 1.33872  | 0.001459 | 0.029371 |
| TRIB1    | 13.4087 | 8.41602 | 5.29874  | 3.85114  | 1.59324  | 0.001458 | 0.029371 |
| MYC      | 29.1745 | 51.1693 | 31.9802  | 36.8652  | -1.7539  | 0.001455 | 0.029371 |
| GIGYF2   | 7.79743 | 9.4193  | 11.9017  | 12.3582  | -1.208   | 0.001471 | 0.029548 |
| JUNB     | 195.23  | 143.116 | 80.32    | 73.5777  | 1.36414  | 0.001488 | 0.029751 |
| COPB2    | 40.449  | 33.0437 | 37.6523  | 34.6255  | 1.2241   | 0.001488 | 0.029751 |
| ZNF7     | 5.18577 | 6.34626 | 8.93701  | 9.59356  | -1.22378 | 0.001494 | 0.02978  |
| DHX40    | 5.75436 | 7.45799 | 11.9724  | 11.517   | -1.29606 | 0.001497 | 0.02978  |
| CSRP2BP  | 3.52163 | 4.63647 | 6.46741  | 6.93193  | -1.31657 | 0.001525 | 0.030157 |
| STAM2    | 7.38467 | 6.01448 | 4.7432   | 4.91618  | 1.22782  | 0.001533 | 0.030157 |
| RAB1A    | 64.5631 | 45.4146 | 32.9907  | 29.7152  | 1.42164  | 0.001533 | 0.030157 |
| OSGIN2   | 11.6037 | 8.61087 | 6.79662  | 6.61477  | 1.34756  | 0.001531 | 0.030157 |
| HARS     | 31.3095 | 24.2603 | 21.9303  | 22.0933  | 1.29057  | 0.00152  | 0.030157 |



|           |         |         |         |         |          |          |          |
|-----------|---------|---------|---------|---------|----------|----------|----------|
| TMED5     | 32.3482 | 23.5093 | 21.4489 | 19.4862 | 1.37597  | 0.00155  | 0.030283 |
| SLAMF8    | 62.6949 | 17.6481 | 22.6    | 31.1474 | 3.55249  | 0.001548 | 0.030283 |
| ARPC1B    | 228.08  | 152.303 | 192.501 | 174.543 | 1.49754  | 0.001546 | 0.030283 |
| MKNK1     | 25.2864 | 15.0196 | 19.9733 | 18.0161 | 1.68356  | 0.001553 | 0.030283 |
| TXNDC11   | 25.8007 | 21.6255 | 19.4771 | 18.178  | 1.19307  | 0.001564 | 0.030425 |
| MANF      | 82.0404 | 47.7499 | 43.9797 | 40.6743 | 1.71813  | 0.001568 | 0.030435 |
| KIAA1370  | 6.65157 | 9.95632 | 14.7939 | 15.8181 | -1.49684 | 0.001579 | 0.030582 |
| CARM1     | 14.0019 | 10.636  | 12.1373 | 11.7014 | 1.31646  | 0.001592 | 0.030759 |
| SESN1     | 8.03748 | 12.7371 | 14.3875 | 16.9712 | -1.58471 | 0.001602 | 0.030841 |
| SOCS3     | 95.3435 | 45.0765 | 20.2271 | 12.5304 | 2.11515  | 0.00161  | 0.030841 |
| SNX12     | 13.7408 | 10.3781 | 10.9424 | 9.85426 | 1.32402  | 0.001614 | 0.030841 |
| JKAMP     | 16.1917 | 11.2283 | 15.2978 | 13.5737 | 1.44204  | 0.001612 | 0.030841 |
| ARHGAP18  | 16.904  | 5.31275 | 12.1931 | 8.98589 | 3.18178  | 0.001604 | 0.030841 |
| MSL3      | 58.6067 | 73.5172 | 49.8704 | 48.6305 | -1.25442 | 0.001638 | 0.031247 |
| LILRA2    | 21.5057 | 3.92957 | 15.6524 | 6.1944  | 5.47277  | 0.001643 | 0.031265 |
| CCDC85B   | 24.085  | 31.7505 | 19.4064 | 20.3417 | -1.31827 | 0.001651 | 0.031351 |
| FAM120B   | 10.1261 | 11.2531 | 12.1298 | 12.8681 | -1.1113  | 0.001662 | 0.031421 |
| HSD3B7    | 12.3274 | 4.95825 | 3.55415 | 2.62862 | 2.48623  | 0.001662 | 0.031421 |
| C1GALT1   | 16.0737 | 19.5105 | 8.81927 | 9.54238 | -1.21382 | 0.001686 | 0.031659 |
| VAMP3     | 30.4614 | 22.964  | 23.6481 | 20.9136 | 1.32648  | 0.001687 | 0.031659 |
| C17orf87  | 32.406  | 12.2092 | 7.91675 | 10.5985 | 2.65424  | 0.001687 | 0.031659 |
| APP       | 29.6554 | 21.4725 | 29.0939 | 27.6692 | 1.38109  | 0.001689 | 0.031659 |
| DENND4C   | 5.57093 | 7.71633 | 11.2017 | 12.339  | -1.38511 | 0.001699 | 0.03171  |
| HSPA6     | 6.98876 | 1.98081 | 5.85321 | 3.45542 | 3.52824  | 0.001697 | 0.03171  |
| B3GNT5    | 15.5806 | 5.77385 | 4.40219 | 4.38847 | 2.69848  | 0.001709 | 0.031769 |
| PNP       | 37.659  | 20.281  | 25.0088 | 24.4527 | 1.85686  | 0.001706 | 0.031769 |
| ARHGAP31  | 32.6568 | 12.107  | 7.2092  | 6.36938 | 2.69735  | 0.001717 | 0.031837 |
| MESDC2    | 19.6379 | 15.1676 | 9.99669 | 9.52164 | 1.29473  | 0.001745 | 0.032216 |
| CLEC7A    | 92.8537 | 21.758  | 46.4764 | 38.5038 | 4.26756  | 0.001742 | 0.032216 |
| HERPUD1   | 58.7984 | 46.3956 | 70.0823 | 65.079  | 1.26733  | 0.00176  | 0.032229 |
| LOC254128 | 2.66573 | 4.16299 | 4.71318 | 5.21681 | -1.56167 | 0.001758 | 0.032229 |
| ZBTB44    | 7.19221 | 10.8908 | 12.3021 | 13.2298 | -1.51425 | 0.001756 | 0.032229 |
| SELL      | 284.585 | 422.996 | 310.766 | 320.638 | -1.48636 | 0.001759 | 0.032229 |
| CDC14A    | 6.32023 | 9.16237 | 10.7953 | 12.7891 | -1.44969 | 0.001772 | 0.032301 |
| TMEM188   | 11.7175 | 9.73838 | 11.008  | 9.91293 | 1.20323  | 0.001769 | 0.032301 |
| SSR1      | 20.4173 | 16.2022 | 17.0114 | 16.7013 | 1.26016  | 0.001775 | 0.032301 |
| PDIA3     | 166.606 | 108.942 | 64.0028 | 64.6897 | 1.52931  | 0.001803 | 0.032653 |
| ARPC5     | 199.28  | 148.667 | 149.946 | 127.695 | 1.34044  | 0.001806 | 0.032653 |
| 8-Mar     | 12.5137 | 15.9759 | 14.2403 | 14.8637 | -1.27667 | 0.001801 | 0.032653 |
| LMNB1     | 98.2718 | 70.5649 | 17.6835 | 18.4167 | 1.39264  | 0.001836 | 0.032743 |
| RALB      | 70.5381 | 50.9708 | 21.4171 | 21.7723 | 1.38389  | 0.001837 | 0.032743 |

|           |         |         |          |          |          |          |          |
|-----------|---------|---------|----------|----------|----------|----------|----------|
| DEK       | 105.536 | 88.2434 | 66.5885  | 62.1887  | 1.19596  | 0.001816 | 0.032743 |
| PHF15     | 33.9395 | 43.2423 | 24.1738  | 27.8857  | -1.2741  | 0.001821 | 0.032743 |
| LOC282997 | 3.42613 | 6.94782 | 7.47218  | 9.9172   | -2.02789 | 0.001834 | 0.032743 |
| JOSD2     | 21.4453 | 15.1641 | 12.9366  | 11.1023  | 1.41421  | 0.001835 | 0.032743 |
| GCA       | 25.4716 | 15.4348 | 15.6895  | 14.0892  | 1.65027  | 0.001833 | 0.032743 |
| FAM168B   | 10.9761 | 14.0777 | 25.319   | 24.922   | -1.28258 | 0.001849 | 0.032883 |
| OFD1      | 14.1537 | 18.9347 | 15.7469  | 19.6735  | -1.3378  | 0.001867 | 0.03314  |
| PAPD5     | 5.16612 | 6.43671 | 4.35647  | 4.60913  | -1.24595 | 0.001892 | 0.033526 |
| XPO4      | 3.66435 | 4.69206 | 5.13308  | 5.85907  | -1.28046 | 0.001904 | 0.03366  |
| C5orf56   | 10.3849 | 12.0321 | 2.29999  | 3.05393  | -1.15861 | 0.001924 | 0.033886 |
| IFNA6     | 4.58602 | 17.6366 | 0.006851 | 0.026239 | -3.84573 | 0.001923 | 0.033886 |
| LOC440944 | 3.65044 | 5.0322  | 4.10757  | 5.23047  | -1.37852 | 0.001931 | 0.033935 |
| ERICH1    | 16.4128 | 12.5979 | 10.6337  | 10.8098  | 1.30281  | 0.001945 | 0.034109 |
| PTPRC     | 264.764 | 305.292 | 335.535  | 345.177  | -1.15307 | 0.00195  | 0.034129 |
| ZBP1      | 72.3368 | 94.2489 | 7.14562  | 7.78291  | -1.30292 | 0.001985 | 0.034597 |
| TMEM229B  | 15.3719 | 22.4042 | 5.19833  | 7.06491  | -1.45747 | 0.001984 | 0.034597 |
| TLR2      | 72.306  | 36.0451 | 23.5343  | 21.1604  | 2.00598  | 0.00199  | 0.034626 |
| KIAA0495  | 3.18719 | 4.79032 | 6.22987  | 7.31395  | -1.50299 | 0.001998 | 0.034686 |
| CD40      | 270.741 | 113.885 | 19.9798  | 21.0842  | 2.37731  | 0.00202  | 0.035    |
| DYRK2     | 12.21   | 19.165  | 25.9533  | 29.1804  | -1.56961 | 0.002048 | 0.035387 |
| CD97      | 114.788 | 86.5274 | 57.3484  | 54.3633  | 1.32661  | 0.002058 | 0.035387 |
| TMSB10    | 3201.71 | 2391.2  | 1502.85  | 1533.35  | 1.33895  | 0.002071 | 0.035387 |
| METTL16   | 4.13273 | 5.70377 | 6.32331  | 7.20826  | -1.38014 | 0.002068 | 0.035387 |
| VEZF1     | 14.8018 | 17.8595 | 18.4255  | 19.726   | -1.20658 | 0.002051 | 0.035387 |
| TCEB1     | 15.615  | 11.4783 | 10.8036  | 10.0063  | 1.36039  | 0.002067 | 0.035387 |
| CTSH      | 228.432 | 120.451 | 124.617  | 114.763  | 1.89647  | 0.002064 | 0.035387 |
| NDUFV2    | 67.3749 | 50.1138 | 41.3217  | 41.9513  | 1.34444  | 0.002078 | 0.035435 |
| CNOT1     | 36.8341 | 42.4316 | 36.7099  | 38.3934  | -1.15197 | 0.002085 | 0.035488 |
| RNF19B    | 161.146 | 119.405 | 21.1503  | 16.7472  | 1.34957  | 0.002133 | 0.035605 |
| TRIM23    | 3.42044 | 4.46717 | 6.34283  | 6.94361  | -1.30602 | 0.002141 | 0.035605 |
| RHEB      | 32.9778 | 26.0737 | 15.0689  | 13.1311  | 1.26479  | 0.002152 | 0.035605 |
| AASDH     | 2.3994  | 3.45394 | 4.34288  | 5.47588  | -1.4395  | 0.002099 | 0.035605 |
| PIM2      | 115.713 | 153.314 | 62.7434  | 58.4004  | -1.32496 | 0.002125 | 0.035605 |
| TNKS      | 2.98986 | 3.96968 | 5.11671  | 5.66195  | -1.32771 | 0.002104 | 0.035605 |
| MAP3K4    | 5.33673 | 7.25335 | 9.7344   | 10.1193  | -1.35914 | 0.002113 | 0.035605 |
| NUDCD3    | 11.1033 | 13.1627 | 14.0886  | 14.9653  | -1.18547 | 0.002148 | 0.035605 |
| LEMD3     | 10.9578 | 12.242  | 11.8765  | 13.0223  | -1.11719 | 0.002147 | 0.035605 |
| FXR2      | 14.8771 | 12.4738 | 15.76    | 14.5455  | 1.19267  | 0.002127 | 0.035605 |
| PAPOLG    | 4.97419 | 5.9197  | 5.60016  | 6.28224  | -1.19008 | 0.00215  | 0.035605 |
| SMAD3     | 7.71292 | 13.8131 | 12.7306  | 15.7784  | -1.7909  | 0.002126 | 0.035605 |
| MYO1C     | 11.0363 | 5.59077 | 9.35346  | 5.58155  | 1.97403  | 0.002153 | 0.035605 |

|           |         |         |         |          |          |          |          |
|-----------|---------|---------|---------|----------|----------|----------|----------|
| LASS5     | 18.49   | 15.0732 | 15.7686 | 15.2286  | 1.22668  | 0.002104 | 0.035605 |
| PACSIN2   | 30.4151 | 21.6921 | 26.3169 | 22.4387  | 1.40213  | 0.002149 | 0.035605 |
| PPP6C     | 15.5777 | 18.0193 | 21.2523 | 22.4771  | -1.15674 | 0.002166 | 0.035713 |
| TUBA1C    | 135.104 | 91.772  | 27.0275 | 16.9599  | 1.47217  | 0.002169 | 0.035713 |
| TMEM106B  | 7.65498 | 9.84504 | 8.81869 | 9.78914  | -1.2861  | 0.002172 | 0.035713 |
| ZNF480    | 3.54644 | 4.55492 | 4.90914 | 5.01264  | -1.28437 | 0.002182 | 0.035748 |
| CCDC91    | 11.1213 | 13.61   | 11.8689 | 12.4319  | -1.22378 | 0.002182 | 0.035748 |
| FRG1      | 35.346  | 23.2624 | 23.5358 | 22.4475  | 1.51945  | 0.002189 | 0.0358   |
| COPB1     | 47.5108 | 41.6277 | 40.8763 | 40.624   | 1.14132  | 0.002195 | 0.035801 |
| C14orf119 | 18.7416 | 14.94   | 18.5776 | 17.42    | 1.25446  | 0.002198 | 0.035801 |
| MYCBP2    | 25.8713 | 32.3474 | 17.6171 | 19.6581  | -1.25032 | 0.002219 | 0.036044 |
| PTMS      | 50.6531 | 32.9319 | 16.1345 | 13.8085  | 1.53812  | 0.002225 | 0.036044 |
| GPATCH8   | 12.0151 | 14.2449 | 14.9089 | 16.728   | -1.18558 | 0.002223 | 0.036044 |
| CREB3     | 22.0703 | 18.2102 | 16.6035 | 13.8167  | 1.21197  | 0.00223  | 0.036053 |
| PPP4R1    | 10.6409 | 7.95816 | 11.4098 | 9.44548  | 1.3371   | 0.002238 | 0.036127 |
| PHLDA2    | 9.46111 | 3.67732 | 0.43885 | 0.339487 | 2.57283  | 0.002254 | 0.036321 |
| WDR1      | 119.455 | 102.88  | 101.643 | 94.3967  | 1.16112  | 0.00226  | 0.036349 |
| SLC16A3   | 87.6733 | 39.7716 | 54.7516 | 33.4152  | 2.20442  | 0.002267 | 0.036383 |
| LASP1     | 75.1748 | 61.3242 | 75.608  | 70.4021  | 1.22586  | 0.002274 | 0.036438 |
| CMAS      | 16.6316 | 13.3417 | 14.7161 | 13.5438  | 1.24658  | 0.002283 | 0.036456 |
| SEC23B    | 25.3097 | 18.7366 | 21.0909 | 19.5991  | 1.35082  | 0.002284 | 0.036456 |
| FBXO3     | 6.56738 | 8.48677 | 12.4871 | 13.5237  | -1.29226 | 0.00229  | 0.036483 |
| KBTBD2    | 24.1225 | 27.1289 | 20.0085 | 20.9987  | -1.12463 | 0.002297 | 0.036538 |
| PPAPDC1B  | 11.8197 | 8.26166 | 12.9862 | 11.5873  | 1.43067  | 0.002315 | 0.036755 |
| PPWD1     | 13.6077 | 19.668  | 25.2131 | 30.1224  | -1.44536 | 0.002348 | 0.037214 |
| ZNF623    | 3.63424 | 4.76589 | 6.68371 | 7.35482  | -1.31139 | 0.002354 | 0.03722  |
| RPL23A    | 153.809 | 222.128 | 303.794 | 341.178  | -1.44418 | 0.002357 | 0.03722  |
| SLFN11    | 23.0565 | 12.4244 | 15.8121 | 13.146   | 1.85575  | 0.002372 | 0.03739  |
| NSUN6     | 5.36652 | 6.90874 | 5.98977 | 6.31031  | -1.28738 | 0.002397 | 0.037717 |
| NEDD8     | 100.201 | 80.0254 | 107.779 | 97.7305  | 1.25211  | 0.002404 | 0.03775  |
| PEX1      | 3.45772 | 4.75111 | 8.27207 | 8.65309  | -1.37406 | 0.002422 | 0.037903 |
| ORMDL2    | 31.5382 | 24.0603 | 16.4626 | 14.9387  | 1.3108   | 0.00242  | 0.037903 |
| POLK      | 11.7803 | 9.6681  | 6.88504 | 6.01748  | 1.21848  | 0.002455 | 0.037937 |
| EPB41     | 35.476  | 55.4264 | 75.417  | 88.1956  | -1.56236 | 0.002432 | 0.037937 |
| ACSL4     | 32.938  | 23.5448 | 19.3856 | 15.6199  | 1.39895  | 0.002451 | 0.037937 |
| TRAM1     | 132.525 | 103.627 | 90.866  | 82.3338  | 1.27886  | 0.002452 | 0.037937 |
| STX4      | 49.9699 | 41.413  | 37.9246 | 35.6781  | 1.20662  | 0.002448 | 0.037937 |
| UGP2      | 71.0473 | 51.7248 | 44.9246 | 44.4354  | 1.37356  | 0.002433 | 0.037937 |
| TNIK      | 8.62834 | 11.7915 | 11.1904 | 12.956   | -1.3666  | 0.002449 | 0.037937 |
| ATP1B3    | 87.874  | 51.4315 | 37.7509 | 29.2653  | 1.70856  | 0.002471 | 0.038072 |
| TP53      | 20.4628 | 27.29   | 19.8576 | 22.8741  | -1.33364 | 0.00248  | 0.038072 |

|           |         |         |          |          |          |          |          |
|-----------|---------|---------|----------|----------|----------|----------|----------|
| CCNL1     | 46.6084 | 54.3599 | 45.9562  | 49.1446  | -1.16631 | 0.00248  | 0.038072 |
| FBXO18    | 20.5747 | 25.8504 | 22.5964  | 22.7686  | -1.25642 | 0.002481 | 0.038072 |
| BTG3      | 30.5426 | 24.1259 | 8.90707  | 7.04875  | 1.26597  | 0.002517 | 0.038562 |
| NPRL3     | 4.58878 | 6.67329 | 7.20056  | 8.37587  | -1.45426 | 0.002528 | 0.038653 |
| SLC25A12  | 5.00157 | 6.06921 | 4.65087  | 4.51522  | -1.21346 | 0.00255  | 0.038924 |
| C1GALT1C1 | 26.3963 | 19.3572 | 10.8077  | 10.2889  | 1.36364  | 0.002573 | 0.039163 |
| ERP44     | 29.3229 | 22.4313 | 14.4644  | 13.6815  | 1.30723  | 0.002575 | 0.039163 |
| NAP1L1    | 50.406  | 74.8932 | 108.524  | 116.424  | -1.4858  | 0.002586 | 0.039197 |
| RNMT      | 7.24971 | 9.15776 | 10.6115  | 11.378   | -1.26319 | 0.002583 | 0.039197 |
| SERTAD2   | 7.01592 | 9.12283 | 12.5102  | 12.8432  | -1.3003  | 0.002599 | 0.039234 |
| PARP8     | 24.8164 | 33.5959 | 17.2869  | 21.0393  | -1.35378 | 0.002606 | 0.039234 |
| TMEM194A  | 19.2689 | 12.9867 | 8.7009   | 8.31918  | 1.48374  | 0.002604 | 0.039234 |
| BLMH      | 16.8294 | 21.2993 | 17.6925  | 17.9645  | -1.2656  | 0.002596 | 0.039234 |
| FAM82A2   | 14.3162 | 11.2527 | 9.06886  | 8.59532  | 1.27224  | 0.002637 | 0.039626 |
| CTCF      | 16.6542 | 19.4542 | 23.9427  | 25.1465  | -1.16813 | 0.002648 | 0.039728 |
| LUC7L2    | 25.9832 | 30.306  | 38.41    | 39.6219  | -1.16637 | 0.002667 | 0.039938 |
| CDK13     | 8.47332 | 9.98696 | 13.0404  | 13.781   | -1.17864 | 0.002682 | 0.039964 |
| ATP2A2    | 38.9324 | 26.3267 | 21.2309  | 21.8969  | 1.47882  | 0.002679 | 0.039964 |
| RUNX2     | 3.52856 | 6.71988 | 5.34627  | 4.39217  | -1.90442 | 0.002679 | 0.039964 |
| BTBD10    | 11.6405 | 9.58633 | 8.28456  | 8.44758  | 1.21428  | 0.002693 | 0.040058 |
| ADNP      | 12.7368 | 16.3906 | 22.4573  | 24.3254  | -1.28687 | 0.002714 | 0.040157 |
| CTNBL1    | 53.5241 | 40.8321 | 23.5417  | 23.5031  | 1.31083  | 0.002706 | 0.040157 |
| S100A10   | 115.305 | 65.4925 | 116.715  | 91.2635  | 1.76058  | 0.002709 | 0.040157 |
| UBA7      | 70.6209 | 90.1933 | 37.3405  | 42.9904  | -1.27715 | 0.002735 | 0.040321 |
| IFNA10    | 12.1327 | 37.1916 | 0.011081 | 0.034729 | -3.06541 | 0.002739 | 0.040321 |
| CBX6      | 23.3379 | 16.2219 | 17.5843  | 17.7091  | 1.43867  | 0.002738 | 0.040321 |
| GNB4      | 33.1983 | 25.0129 | 10.9369  | 10.1874  | 1.32724  | 0.002761 | 0.040523 |
| VPS29     | 60.5276 | 46.4804 | 40.6623  | 36.1166  | 1.30222  | 0.002762 | 0.040523 |
| ZNF192    | 5.26675 | 7.51648 | 8.77246  | 10.1799  | -1.42716 | 0.002778 | 0.040555 |
| DCAF16    | 4.99706 | 7.33845 | 7.64787  | 9.03064  | -1.46855 | 0.002776 | 0.040555 |
| KIAA0174  | 67.7598 | 62.0887 | 66.6316  | 64.4989  | 1.09134  | 0.002777 | 0.040555 |
| REPS1     | 7.16533 | 8.4725  | 11.3461  | 11.9551  | -1.18243 | 0.002786 | 0.040593 |
| ACN9      | 2.15745 | 3.28393 | 5.04368  | 5.56903  | -1.52213 | 0.002804 | 0.040593 |
| PARN      | 8.71616 | 10.7858 | 12.3842  | 13.4607  | -1.23745 | 0.002797 | 0.040593 |
| LETMD1    | 11.2627 | 14.9782 | 16.5811  | 16.9804  | -1.32989 | 0.002803 | 0.040593 |
| MLLT3     | 8.67615 | 13.5831 | 13.8199  | 16.6898  | -1.56557 | 0.002799 | 0.040593 |
| ZNF506    | 6.25158 | 8.34038 | 8.12626  | 8.81761  | -1.33412 | 0.002809 | 0.040609 |
| DAPK3     | 13.0726 | 10.7044 | 11.6477  | 10.4121  | 1.22124  | 0.002831 | 0.040851 |
| C3orf38   | 31.6583 | 24.7153 | 10.9929  | 11.1655  | 1.28092  | 0.00284  | 0.040916 |
| ICAM1     | 160.123 | 91.9974 | 16.6418  | 19.1199  | 1.74052  | 0.002865 | 0.04103  |
| EIF6      | 66.4508 | 54.3387 | 44.0345  | 42.3638  | 1.2229   | 0.002862 | 0.04103  |

|          |         |         |         |         |          |          |          |
|----------|---------|---------|---------|---------|----------|----------|----------|
| DGCR2    | 17.3692 | 21.8313 | 22.5257 | 23.0158 | -1.2569  | 0.002867 | 0.04103  |
| SLC50A1  | 29.067  | 21.7361 | 26.2744 | 23.0429 | 1.33727  | 0.002857 | 0.04103  |
| VMAC     | 3.99879 | 5.98548 | 7.24344 | 9.24135 | -1.49682 | 0.002892 | 0.041202 |
| PION     | 21.8516 | 16.4268 | 14.2208 | 13.1187 | 1.33025  | 0.002898 | 0.041202 |
| KIAA0947 | 11.1438 | 13.1766 | 11.1238 | 12.7078 | -1.18242 | 0.002895 | 0.041202 |
| FANCF    | 7.00114 | 9.00043 | 8.22914 | 9.20705 | -1.28557 | 0.002895 | 0.041202 |
| ELF1     | 102.889 | 120.171 | 71.1638 | 69.0569 | -1.16797 | 0.002911 | 0.041206 |
| MYST2    | 11.3314 | 13.3601 | 15.0565 | 16.1144 | -1.17903 | 0.002907 | 0.041206 |
| GBA      | 25.9226 | 17.7184 | 17.8212 | 14.2335 | 1.46303  | 0.002917 | 0.041206 |
| CEP170   | 9.40915 | 4.95486 | 7.05785 | 6.32131 | 1.89897  | 0.002914 | 0.041206 |
| DCAF8    | 19.9674 | 25.9975 | 39.114  | 40.7476 | -1.302   | 0.00294  | 0.041459 |
| TMEM194B | 4.05215 | 5.3113  | 3.87913 | 4.25105 | -1.31074 | 0.002945 | 0.041466 |
| NONO     | 74.8952 | 85.6522 | 92.9334 | 94.2105 | -1.14363 | 0.002962 | 0.041601 |
| HIF1AN   | 10.5513 | 12.2919 | 12.9138 | 13.4429 | -1.16497 | 0.002964 | 0.041601 |
| TBC1D22B | 8.02384 | 6.48153 | 5.30215 | 5.07648 | 1.23795  | 0.002976 | 0.041703 |
| DDX17    | 114.562 | 159.568 | 212.995 | 239.849 | -1.39286 | 0.003    | 0.041717 |
| BRWD1    | 7.80643 | 10.507  | 12.9905 | 14.8226 | -1.34594 | 0.002996 | 0.041717 |
| ACTG1    | 764.132 | 575.947 | 571.083 | 518.121 | 1.32674  | 0.003001 | 0.041717 |
| ADAMTSL4 | 25.3482 | 9.22254 | 11.4108 | 10.4797 | 2.74851  | 0.003001 | 0.041717 |
| FCGR2A   | 52.0222 | 13.9951 | 40.7206 | 27.8814 | 3.71718  | 0.002982 | 0.041717 |
| NPM1     | 226.76  | 296.415 | 314.571 | 359.828 | -1.30718 | 0.003011 | 0.041785 |
| MOBK1B   | 169.637 | 134.415 | 68.3471 | 65.8777 | 1.26205  | 0.003017 | 0.041807 |
| SNRK     | 20.5542 | 27.1955 | 32.1683 | 38.1623 | -1.32311 | 0.003031 | 0.041938 |
| SLC25A36 | 5.5778  | 7.56642 | 11.306  | 12.7495 | -1.35652 | 0.00305  | 0.042052 |
| PDCD11   | 6.65826 | 8.55057 | 8.03473 | 9.44215 | -1.28421 | 0.003054 | 0.042052 |
| DERL2    | 29.5389 | 23.2934 | 22.3573 | 21.3601 | 1.26812  | 0.003053 | 0.042052 |
| TANK     | 115.832 | 92.6097 | 28.3036 | 26.202  | 1.25075  | 0.003074 | 0.042064 |
| TMEM106A | 42.9949 | 29.5785 | 6.1436  | 4.82481 | 1.45359  | 0.003072 | 0.042064 |
| PIP4K2C  | 13.8596 | 11.6842 | 10.8645 | 11.2458 | 1.18618  | 0.003061 | 0.042064 |
| ARHGEF2  | 43.1665 | 37.3166 | 44.0609 | 40.81   | 1.15677  | 0.003069 | 0.042064 |
| MOAP1    | 10.863  | 15.0523 | 23.5253 | 25.3536 | -1.38565 | 0.003089 | 0.042199 |
| C1QB     | 30.2442 | 13.0812 | 2.52173 | 7.33363 | 2.31203  | 0.003102 | 0.042251 |
| ARF4     | 61.2621 | 42.7536 | 41.6684 | 37.7028 | 1.43291  | 0.003101 | 0.042251 |
| LPCAT2   | 13.0665 | 7.50657 | 9.0653  | 7.27359 | 1.74068  | 0.003109 | 0.042269 |
| LCP2     | 150.976 | 101.018 | 55.6164 | 68.3395 | 1.49455  | 0.003131 | 0.042501 |
| MBNL1    | 83.6734 | 96.2464 | 95.1141 | 101.499 | -1.15026 | 0.003135 | 0.042501 |
| TRPC4AP  | 73.3013 | 63.4412 | 43.6881 | 46.012  | 1.15542  | 0.003166 | 0.042804 |
| MYO1G    | 108.583 | 76.1763 | 42.0037 | 29.1359 | 1.42542  | 0.003168 | 0.042804 |
| ARNTL2   | 16.6872 | 9.50116 | 1.86345 | 1.41631 | 1.75634  | 0.003173 | 0.042806 |
| PLD2     | 8.37407 | 4.8009  | 9.30828 | 6.65926 | 1.74427  | 0.003189 | 0.042893 |
| GBGT1    | 11.7038 | 6.2563  | 7.9455  | 7.13947 | 1.87073  | 0.003185 | 0.042893 |

|          |         |         |          |          |          |          |          |
|----------|---------|---------|----------|----------|----------|----------|----------|
| OBFC2A   | 31.467  | 23.5123 | 12.9921  | 10.9537  | 1.33832  | 0.003195 | 0.042902 |
| C19orf66 | 113.67  | 129.324 | 31.2191  | 31.9176  | -1.13772 | 0.003206 | 0.042956 |
| GON4L    | 7.55365 | 8.99439 | 8.25484  | 9.66854  | -1.19073 | 0.003213 | 0.042956 |
| SGMS1    | 13.7054 | 9.34898 | 11.1562  | 10.2962  | 1.46598  | 0.003213 | 0.042956 |
| PLEKHG4  | 2.79122 | 4.5464  | 5.34356  | 6.4786   | -1.62882 | 0.003225 | 0.043053 |
| KIAA0247 | 47.4286 | 35.7452 | 25.6174  | 23.829   | 1.32685  | 0.003239 | 0.043095 |
| PDCD10   | 40.953  | 33.2711 | 30.3685  | 27.4532  | 1.23089  | 0.003238 | 0.043095 |
| ARRB2    | 75.6791 | 46.077  | 136.382  | 115.355  | 1.64245  | 0.003253 | 0.043216 |
| FYCO1    | 5.16912 | 6.81643 | 7.14353  | 7.12183  | -1.31868 | 0.003258 | 0.043216 |
| ZNF75A   | 6.57432 | 8.15087 | 7.41937  | 8.58434  | -1.2398  | 0.003267 | 0.04328  |
| CD74     | 3487.6  | 2110.38 | 2194.25  | 2183.72  | 1.65259  | 0.003282 | 0.043344 |
| ZDHHC6   | 22.0168 | 19.1938 | 20.9527  | 20.2449  | 1.14708  | 0.003279 | 0.043344 |
| PPM1K    | 49.6411 | 58.1598 | 11.2315  | 11.7654  | -1.17161 | 0.00329  | 0.043376 |
| SMEK2    | 26.6362 | 30.4735 | 28.2958  | 28.4209  | -1.14406 | 0.003301 | 0.043463 |
| SLC6A12  | 18.1609 | 8.56799 | 2.19684  | 2.03527  | 2.11962  | 0.00331  | 0.043518 |
| VRK2     | 61.0844 | 41.362  | 13.1027  | 13.8468  | 1.47682  | 0.003332 | 0.043586 |
| HNRNPA3  | 24.81   | 30.682  | 36.5914  | 37.5327  | -1.23668 | 0.003335 | 0.043586 |
| CTDSPL2  | 9.47363 | 10.898  | 10.5166  | 11.0439  | -1.15035 | 0.003326 | 0.043586 |
| C10orf2  | 4.8181  | 6.40769 | 5.27335  | 5.63401  | -1.32992 | 0.00333  | 0.043586 |
| ATM      | 23.6775 | 40.607  | 43.6323  | 57.2054  | -1.715   | 0.003346 | 0.043656 |
| RHOC     | 42.1939 | 23.524  | 22.7797  | 15.4167  | 1.79366  | 0.003352 | 0.043668 |
| BANP     | 8.80908 | 11.1904 | 11.8351  | 11.5962  | -1.27033 | 0.003371 | 0.04385  |
| FLCN     | 16.6729 | 13.1666 | 13.2891  | 12.8659  | 1.2663   | 0.00338  | 0.043906 |
| CASP4    | 228.774 | 187.865 | 58.4149  | 63.0327  | 1.21776  | 0.00341  | 0.044053 |
| XIAP     | 11.833  | 13.8365 | 8.29726  | 8.98125  | -1.16932 | 0.003397 | 0.044053 |
| KIAA1147 | 13.9313 | 19.7276 | 22.1731  | 23.9918  | -1.41606 | 0.003412 | 0.044053 |
| OSM      | 19.5533 | 5.07931 | 3.16341  | 3.06402  | 3.8496   | 0.003406 | 0.044053 |
| KIAA1712 | 2.07654 | 2.91739 | 4.8791   | 5.46838  | -1.40493 | 0.003442 | 0.044364 |
| LILRB4   | 331.198 | 234.791 | 27.9735  | 16.1381  | 1.41061  | 0.003447 | 0.044364 |
| PPIB     | 266.78  | 195.6   | 199.942  | 189.713  | 1.36391  | 0.003456 | 0.044364 |
| CSDE1    | 130.805 | 151.428 | 148.691  | 153.577  | -1.15767 | 0.003453 | 0.044364 |
| ADPRHL2  | 51.1174 | 41.1134 | 17.1878  | 16.5593  | 1.24332  | 0.003493 | 0.044437 |
| PSMA4    | 228.701 | 176.865 | 61.0296  | 64.0197  | 1.29308  | 0.003467 | 0.044437 |
| PSMB2    | 18.4911 | 14.703  | 9.85954  | 10.2898  | 1.25764  | 0.003507 | 0.044437 |
| IFI27    | 499.148 | 264.131 | 13.8807  | 0.893476 | 1.88977  | 0.003504 | 0.044437 |
| APOBEC3B | 37.5161 | 16.4781 | 0.482755 | 0.213755 | 2.27672  | 0.003508 | 0.044437 |
| C19orf2  | 20.3525 | 26.6099 | 26.6765  | 30.2974  | -1.30745 | 0.003481 | 0.044437 |
| BHLHE40  | 51.7941 | 22.254  | 25.462   | 22.9711  | 2.32741  | 0.003497 | 0.044437 |
| TREML2   | 5.57846 | 2.83019 | 3.40628  | 3.03772  | 1.97105  | 0.00348  | 0.044437 |
| ARHGAP15 | 38.9201 | 47.1257 | 43.3215  | 46.2241  | -1.21083 | 0.003498 | 0.044437 |
| ITGA5    | 52.9863 | 28.0225 | 38.2459  | 31.4546  | 1.89085  | 0.003513 | 0.044441 |



|              |         |         |         |         |          |          |          |
|--------------|---------|---------|---------|---------|----------|----------|----------|
| PSIP1        | 22.8234 | 35.7597 | 50.3352 | 57.734  | -1.5668  | 0.003527 | 0.044551 |
| USP8         | 14.0531 | 12.7048 | 14.289  | 13.3909 | 1.10613  | 0.003532 | 0.044555 |
| ZFP161       | 7.6731  | 9.6495  | 14.2876 | 15.6217 | -1.25757 | 0.003549 | 0.044702 |
| ARID3A       | 8.03898 | 5.62061 | 7.14138 | 5.88246 | 1.43027  | 0.003558 | 0.044754 |
| KDM3A        | 13.4391 | 18.1064 | 28.9316 | 31.1165 | -1.34729 | 0.00357  | 0.044765 |
| SYNRG        | 17.4986 | 21.9095 | 20.9544 | 23.8621 | -1.25208 | 0.003567 | 0.044765 |
| ADRM1        | 69.6789 | 58.4928 | 39.5076 | 40.1144 | 1.19124  | 0.003587 | 0.044892 |
| DCUN1D3      | 11.2242 | 4.55064 | 1.88908 | 1.9082  | 2.46651  | 0.003593 | 0.044892 |
| CIRBP        | 124.268 | 150.609 | 126.447 | 144.847 | -1.21197 | 0.003598 | 0.044892 |
| FAM129B      | 69.0263 | 16.5205 | 24.7988 | 15.2925 | 4.17822  | 0.0036   | 0.044892 |
| IFI27L2      | 29.6491 | 22.5209 | 34.7064 | 32.577  | 1.31651  | 0.00361  | 0.04495  |
| MED23        | 8.04292 | 10.3479 | 13.2094 | 15.074  | -1.28659 | 0.003621 | 0.04502  |
| LBH          | 61.8178 | 105.869 | 138.914 | 176.164 | -1.7126  | 0.003668 | 0.045358 |
| SECTM1       | 166.172 | 105.545 | 22.3196 | 30.044  | 1.57443  | 0.00366  | 0.045358 |
| XPNPEP1      | 26.0087 | 20.7744 | 14.1275 | 14.2519 | 1.25196  | 0.003664 | 0.045358 |
| VDR          | 12.4537 | 3.90322 | 6.71966 | 3.97848 | 3.19062  | 0.003669 | 0.045358 |
| SSTR3        | 12.1559 | 18.3799 | 2.00838 | 2.70222 | -1.51202 | 0.003699 | 0.045666 |
| GRIPAP1      | 38.4451 | 34.9222 | 25.8558 | 24.5054 | 1.10088  | 0.003706 | 0.045686 |
| PSMA6        | 195.435 | 164.022 | 73.9858 | 67.1087 | 1.19152  | 0.003718 | 0.045711 |
| ZNF740       | 11.2721 | 14.8812 | 18.7199 | 20.603  | -1.32018 | 0.003718 | 0.045711 |
| EXOSC4       | 9.99634 | 6.813   | 8.58599 | 7.79542 | 1.46725  | 0.003731 | 0.045801 |
| TRAPPC3      | 30.197  | 25.8663 | 31.0693 | 28.0982 | 1.16743  | 0.003742 | 0.045868 |
| TPM3         | 209.304 | 176.786 | 118.207 | 109.553 | 1.18394  | 0.003784 | 0.045994 |
| PMS1         | 3.22239 | 4.21273 | 5.79605 | 6.36265 | -1.30733 | 0.003774 | 0.045994 |
| PSMA1        | 91.3934 | 76.6361 | 60.1363 | 58.1226 | 1.19256  | 0.003767 | 0.045994 |
| NUP214       | 7.93046 | 9.34227 | 10.1619 | 10.8864 | -1.17802 | 0.003771 | 0.045994 |
| SUCLG2       | 14.4613 | 22.5654 | 16.6605 | 22.6814 | -1.5604  | 0.003773 | 0.045994 |
| HK3          | 14.1774 | 6.04821 | 11.1491 | 9.80034 | 2.34406  | 0.003783 | 0.045994 |
| TMEM187      | 8.2302  | 10.9692 | 4.87765 | 4.49799 | -1.3328  | 0.003801 | 0.046092 |
| PTAFR        | 111.006 | 59.8756 | 43.3012 | 39.6365 | 1.85394  | 0.003802 | 0.046092 |
| 6-Mar        | 18.3968 | 22.8172 | 27.5203 | 29.1602 | -1.24028 | 0.003819 | 0.046163 |
| TWISTNB      | 4.64106 | 5.66939 | 4.92625 | 5.39863 | -1.22157 | 0.003818 | 0.046163 |
| DNAJC1       | 15.8343 | 11.7139 | 12.7791 | 11.4337 | 1.35175  | 0.003836 | 0.046307 |
| UBE2S        | 37.645  | 30.2571 | 8.33814 | 8.14742 | 1.24417  | 0.003853 | 0.046346 |
| SPG7         | 12.4966 | 15.4116 | 22.0438 | 23.3862 | -1.23327 | 0.003847 | 0.046346 |
| ALCAM        | 20.1177 | 11.9791 | 9.49731 | 8.02639 | 1.6794   | 0.003855 | 0.046346 |
| SUB1         | 77.207  | 57.6099 | 34.4483 | 32.3919 | 1.34017  | 0.003891 | 0.04658  |
| SMARCC1      | 13.539  | 17.3882 | 20.1361 | 21.4724 | -1.28431 | 0.003881 | 0.04658  |
| LOC100233209 | 11.7674 | 16.2274 | 15.1817 | 15.8257 | -1.37902 | 0.003887 | 0.04658  |
| GLIPR2       | 128.375 | 79.3936 | 38.4074 | 31.9699 | 1.61694  | 0.003906 | 0.046695 |
| ZNF14        | 4.60076 | 6.50413 | 8.87101 | 9.24354 | -1.41371 | 0.003917 | 0.046718 |

|           |         |         |          |          |          |          |          |
|-----------|---------|---------|----------|----------|----------|----------|----------|
| TUBB2A    | 14.1088 | 7.90893 | 1.4345   | 0.692794 | 1.7839   | 0.003918 | 0.046718 |
| PUM2      | 28.1651 | 33.7896 | 38.6862  | 40.7835  | -1.1997  | 0.003936 | 0.046805 |
| NIPA2     | 23.9781 | 21.0115 | 20.7232  | 17.6608  | 1.14119  | 0.003931 | 0.046805 |
| RAB12     | 29.5395 | 22.0581 | 10.8327  | 10.4679  | 1.33917  | 0.003948 | 0.046877 |
| APOL6     | 94.4838 | 112.163 | 13.4126  | 17.5838  | -1.18712 | 0.003969 | 0.047005 |
| MAPKAPK3  | 40.1448 | 22.16   | 32.9766  | 28.8753  | 1.81159  | 0.003969 | 0.047005 |
| GPD2      | 19.3681 | 15.5002 | 4.78325  | 4.31227  | 1.24954  | 0.003988 | 0.04716  |
| ATG4A     | 6.85141 | 5.82142 | 6.05679  | 5.41868  | 1.17693  | 0.003999 | 0.047225 |
| CSRNP2    | 8.45638 | 7.03451 | 5.51885  | 5.84208  | 1.20213  | 0.004008 | 0.047275 |
| C10orf125 | 16.1636 | 9.45791 | 8.16782  | 8.99992  | 1.709    | 0.004023 | 0.047383 |
| DPH1      | 6.24298 | 9.23176 | 13.393   | 14.8725  | -1.47874 | 0.00403  | 0.047405 |
| NACC1     | 15.0249 | 12.2277 | 12.6032  | 10.8682  | 1.22875  | 0.004058 | 0.047672 |
| PPP2CA    | 55.5562 | 50.2562 | 49.915   | 45.1734  | 1.10546  | 0.004079 | 0.047737 |
| KCNE1L    | 4.48506 | 35.0429 | 0.395558 | 0.263189 | -7.81324 | 0.004079 | 0.047737 |
| GMPPB     | 19.6169 | 11.3625 | 10.0489  | 9.65433  | 1.72647  | 0.00408  | 0.047737 |
| C6orf211  | 19.2876 | 11.5944 | 12.3837  | 11.9318  | 1.66352  | 0.004091 | 0.047798 |
| CMTM6     | 142.648 | 90.6825 | 71.2781  | 61.1207  | 1.57305  | 0.004125 | 0.048066 |
| ZNF101    | 25.4395 | 35.803  | 25.2422  | 31.4146  | -1.40738 | 0.004125 | 0.048066 |
| NMT2      | 3.80467 | 7.73379 | 8.6699   | 11.7423  | -2.03271 | 0.004131 | 0.048073 |
| MYNN      | 4.32945 | 5.03708 | 5.34341  | 5.71256  | -1.16345 | 0.004156 | 0.048298 |
| PIK3IP1   | 57.7285 | 99.0375 | 155.785  | 181.664  | -1.71557 | 0.004169 | 0.048325 |
| C20orf43  | 57.5208 | 45.2676 | 49.8954  | 48.2396  | 1.27068  | 0.004169 | 0.048325 |
| C8orf76   | 14.3697 | 12.2048 | 11.8602  | 10.4003  | 1.17738  | 0.004181 | 0.048332 |
| APOL4     | 30.7828 | 5.16884 | 1.48582  | 6.09462  | 5.95545  | 0.004181 | 0.048332 |
| TRIOBP    | 10.82   | 8.51289 | 11.859   | 10.4363  | 1.27101  | 0.004189 | 0.048355 |
| DOCK2     | 31.2543 | 25.6139 | 41.5249  | 41.4762  | 1.22021  | 0.0042   | 0.048425 |
| YKT6      | 32.1335 | 27.0311 | 24.7802  | 23.2684  | 1.18876  | 0.004224 | 0.048532 |
| EVL       | 146.647 | 194.667 | 163.321  | 178.974  | -1.32746 | 0.004226 | 0.048532 |
| FAM20B    | 7.27521 | 8.75785 | 8.23686  | 8.17248  | -1.20379 | 0.004226 | 0.048532 |
| YLPM1     | 6.12628 | 8.25368 | 9.04559  | 10.7663  | -1.34726 | 0.004241 | 0.048629 |
| ZNF507    | 2.80009 | 4.28149 | 4.25713  | 5.08529  | -1.52905 | 0.004246 | 0.048629 |
| RBM43     | 9.90799 | 13.9548 | 3.4024   | 4.87954  | -1.40844 | 0.004254 | 0.048662 |
| IFIT5     | 64.8996 | 74.2941 | 8.66263  | 8.64087  | -1.14475 | 0.004274 | 0.04882  |
| SOCS1     | 160.865 | 98.2316 | 10.1384  | 10.2625  | 1.63761  | 0.004311 | 0.04912  |
| PRMT7     | 6.87328 | 9.35939 | 11.124   | 12.8989  | -1.36171 | 0.00431  | 0.04912  |
| ATG5      | 11.7247 | 10.1684 | 10.309   | 10.0306  | 1.15305  | 0.004318 | 0.049131 |
| PARP10    | 194.091 | 235.303 | 34.8016  | 41.501   | -1.21234 | 0.004324 | 0.049139 |
| SCAP      | 10.9052 | 13.9659 | 18.9796  | 19.4459  | -1.28066 | 0.004335 | 0.049201 |
| FAM172A   | 2.4508  | 3.09867 | 5.14257  | 5.52125  | -1.26435 | 0.004365 | 0.049478 |
| EPRS      | 15.3252 | 18.1728 | 23.9759  | 26.3621  | -1.18581 | 0.004372 | 0.049494 |
| AKNA      | 36.4516 | 50.2224 | 69.786   | 77.2419  | -1.37778 | 0.004394 | 0.049583 |



|           |         |         |          |          |          |          |          |
|-----------|---------|---------|----------|----------|----------|----------|----------|
| FAM122B   | 9.95827 | 13.476  | 15.8718  | 17.6004  | -1.35325 | 0.004397 | 0.049583 |
| NPTN      | 48.7973 | 35.9539 | 38.7025  | 32.8244  | 1.35722  | 0.004395 | 0.049583 |
| ZNF333    | 3.00082 | 3.64181 | 4.53921  | 5.47146  | -1.2136  | 0.00444  | 0.049601 |
| FOXJ3     | 12.7163 | 16.1683 | 18.3801  | 20.706   | -1.27146 | 0.00445  | 0.049601 |
| SLC41A2   | 21.814  | 11.888  | 1.38762  | 0.962644 | 1.83496  | 0.004421 | 0.049601 |
| LOC731424 | 14.4005 | 7.57158 | 0.196541 | 0.185448 | 1.90192  | 0.004449 | 0.049601 |
| CERKL     | 2.48003 | 4.36843 | 4.9456   | 6.94233  | -1.76144 | 0.004416 | 0.049601 |
| LANCL1    | 6.25527 | 8.06431 | 8.96385  | 10.1739  | -1.2892  | 0.00445  | 0.049601 |
| TAF1D     | 19.6889 | 25.1042 | 26.1245  | 27.8005  | -1.27504 | 0.004432 | 0.049601 |
| WDR3      | 5.82081 | 8.22552 | 8.15748  | 9.04858  | -1.41312 | 0.004449 | 0.049601 |
| RHO       | 15.7701 | 6.67602 | 8.83975  | 5.00274  | 2.36221  | 0.004427 | 0.049601 |
| SCYL2     | 22.2485 | 18.128  | 15.1887  | 14.9551  | 1.2273   | 0.004466 | 0.049604 |
| PHF14     | 5.73923 | 7.52172 | 8.12626  | 9.04647  | -1.31058 | 0.004464 | 0.049604 |
| GTF3C3    | 7.74001 | 9.22174 | 9.13125  | 10.5051  | -1.19144 | 0.00447  | 0.049604 |
| SPCS2     | 13.8721 | 10.5522 | 12.7147  | 10.8917  | 1.31462  | 0.004473 | 0.049604 |
| GOLM1     | 17.8991 | 5.92123 | 3.52499  | 3.36382  | 3.02288  | 0.004492 | 0.049751 |
| NR1D1     | 1.72418 | 3.25053 | 4.9127   | 5.92373  | -1.88526 | 0.004523 | 0.049898 |
| PIP5K1A   | 17.3784 | 15.7687 | 13.276   | 13.4233  | 1.10208  | 0.004512 | 0.049898 |
| DGKQ      | 7.43517 | 12.1941 | 11.7927  | 15.3473  | -1.64006 | 0.004522 | 0.049898 |
| 1-Mar     | 15.0491 | 7.89315 | 19.9725  | 15.1278  | 1.9066   | 0.004534 | 0.049959 |
| SPI1      | 195.107 | 121.283 | 128.762  | 99.9977  | 1.60869  | 0.00454  | 0.049963 |

**Supplemental Table IV: Mixed-model ANOVA with multiple testing correction (Partek Genomics Suite)**

| <b>Sig. Level (FDR): 0.05; total number of p-values: 8716</b> |                       |                |
|---------------------------------------------------------------|-----------------------|----------------|
| <b>Method: Step Up</b>                                        |                       |                |
| <b>Comparison (ANOVA)</b>                                     | <b>Cutoff p-value</b> | <b># Genes</b> |
| <b>All Groups</b>                                             | 0.04                  | 6427           |
| <b>sham ADEH+ vs sham ADEH-</b>                               | $6 \times 10^{-6}$    | 1              |
| <b>HSV-1 ADEH+ vs HSV-1 ADEH-</b>                             | 0.005                 | 792            |
| <b>HSV-1 ADEH+ vs sham ADEH+</b>                              | 0.03                  | 5837           |
| <b>HSV-1 ADEH- vs sham ADEH-</b>                              | 0.03                  | 5520           |

Supplemental Table V. The top 20 most up-regulated genes in ADEH+ as compared to ADEH- in response to HSV-1 stimulation

| Refseq Symbol | Entrez Gene Name                                                                          | Gene symbol | p-value  | ADEH+ vs ADEH- (Fold Change) |
|---------------|-------------------------------------------------------------------------------------------|-------------|----------|------------------------------|
| IFNG          | interferon, gamma                                                                         | IFNG        | 1.27E-03 | 7.632                        |
| APOL3         | apolipoprotein L, 4                                                                       | APOL4       | 4.18E-03 | 5.955                        |
| LILRA2        | leukocyte immunoglobulin-like receptor, subfamily A (with TM domain), member 2            | LILRA2      | 1.64E-03 | 5.473                        |
| TGM2          | transglutaminase 2 (C polypeptide, protein-glutamine-gamma-glutamyltransferase)           | TGM2        | 2.43E-04 | 5.185                        |
| CLEC7A        | C-type lectin domain family 7, member A                                                   | CLEC7A      | 1.74E-03 | 4.268                        |
| FAM129B       | family with sequence similarity 129, member B                                             | FAM129B     | 3.60E-03 | 4.178                        |
| KCNN4         | potassium intermediate/small conductance calcium-activated channel, subfamily N, member 4 | KCNN4       | 5.42E-04 | 4.168                        |
| OSM           | oncostatin M                                                                              | OSM         | 3.41E-03 | 3.85                         |
| G0S2          | G0/G1switch 2                                                                             | G0S2        | 6.77E-04 | 3.802                        |
| FCGR2A        | Fc fragment of IgG, low affinity IIa, receptor (CD32)                                     | FCGR2A      | 2.98E-03 | 3.717                        |
| SLAMF8        | SLAM family member 8                                                                      | SLAMF8      | 1.55E-03 | 3.552                        |
| HSPA6         | heat shock 70kDa protein 6 (HSP70B')                                                      | HSPA6       | 1.70E-03 | 3.528                        |
| EMP1          | epithelial membrane protein 1                                                             | EMP1        | 6.06E-04 | 3.372                        |
| CASP5         | caspase 5, apoptosis-related cysteine peptidase                                           | CASP5       | 1.71E-04 | 3.216                        |
| VDR           | vitamin D (1,25- dihydroxyvitamin D3) receptor                                            | VDR         | 3.67E-03 | 3.191                        |
| ARHGAP18      | Rho GTPase activating protein 18                                                          | ARHGAP18    | 1.60E-03 | 3.182                        |
| ANXA2P2       | annexin A2 pseudogene 2                                                                   | ANXA2P2     | 1.01E-05 | 3.08                         |
| CXCL9         | chemokine (C-X-C motif) ligand 9                                                          | CXCL9       | 4.97E-04 | 3.023                        |
| GOLM1         | golgi membrane protein 1                                                                  | GOLM1       | 4.49E-03 | 3.023                        |
| STARD8        | StAR-related lipid transfer (START) domain containing 8                                   | STARD8      | 5.06E-05 | 2.833                        |
